# Supplementary material for: Hedgehogs, Squirrels, and Blackbirds as Sentinel Hosts for Active Surveillance of Borrelia miyamotoi and Borrelia burgdorferi Complex in Urban and Rural Environments
Source: MDPI journal article supplement (doi:10.3390/microorganisms8121908), 2020-11-30
Supplement: s1 [file s1]

Table S7: *Sciurus vulgaris* – combinations of *Borrelia burgdorferi* s.l. genospecies found in animals with mixed infections

| Number of specimens | <i>B. afzelii</i> | <i>B. garinii</i> | <i>B. burgdorferi</i> s.s. | <i>B. bissettii/carolinensis</i> |
|---------------------|-------------------|-------------------|----------------------------|----------------------------------|
| 1                   | X                 | X                 |                            |                                  |
| 2                   |                   | X                 | X                          |                                  |
| 1                   | X                 | X                 | X                          | X                                |
