# Supplementary material for: Hedgehogs, Squirrels, and Blackbirds as Sentinel Hosts for Active Surveillance of Borrelia miyamotoi and Borrelia burgdorferi Complex in Urban and Rural Environments
Source: MDPI journal article supplement (doi:10.3390/microorganisms8121908), 2020-11-30
Supplement: s1 [file s1]

Table S2: PCR primers and protocols

## multiplex real-time PCR

|                                       |                                                                                    |                                                                                                                                                                                                                                                                                                                                                                                         |
|---------------------------------------|------------------------------------------------------------------------------------|-----------------------------------------------------------------------------------------------------------------------------------------------------------------------------------------------------------------------------------------------------------------------------------------------------------------------------------------------------------------------------------------|
| <b>OspA(Outer membrane Protein A)</b> | ± 139bp                                                                            |                                                                                                                                                                                                                                                                                                                                                                                         |
| F-primer :                            | 5'-AAT ATT TAT TGG GAA TAG GTC TAA-3'                                              | reference: Heylen, D.J.A.; Tijssse, E.; Fonville, M.; Matthysen, E.; Sprong, H. Transmission dynamics of <i>Borrelia burgdorferi</i> s.l. in a bird tick community. <i>Environ. Microbiol</i> <b>2013</b> , <i>15</i> , 663–673.                                                                                                                                                        |
| R-primer:                             | 5'-CTT TGT CTT TTT CTT TRC TTA CA-3'                                               |                                                                                                                                                                                                                                                                                                                                                                                         |
| Probe (Atto520):                      | 5'- <b>Atto520</b> -AAG CAA AAT GTT AGC AGC CTT GA- <b>BHQ1</b> -3'                |                                                                                                                                                                                                                                                                                                                                                                                         |
| <b>FlaB(Flagelin B)</b>               | ± 89bp                                                                             |                                                                                                                                                                                                                                                                                                                                                                                         |
| F-primer :                            | 5'-CAG AIA GAG GTT CTA TAC AIA TTG AIA TAG A-3'                                    | reference: Heylen, D.J.A.; Tijssse, E.; Fonville, M.; Matthysen, E.; Sprong, H. Transmission dynamics of <i>Borrelia burgdorferi</i> s.l. in a bird tick community. <i>Environ. Microbiol</i> <b>2013</b> , <i>15</i> , 663–673.                                                                                                                                                        |
| R-primer2:                            | 5'-GTG CAT TTG GTT AIA TTG CGC-3'                                                  |                                                                                                                                                                                                                                                                                                                                                                                         |
| R-primer:                             | 5'-GTG CAT TTG GTT AIA TTG TGC-3'                                                  |                                                                                                                                                                                                                                                                                                                                                                                         |
| Probe (Atto425):                      | 5'- <b>Atto425</b> -CAA CTI ACA GAI GAA AXT AAI AGA ATT GCT GAI CA- <b>Pho</b> -3' |                                                                                                                                                                                                                                                                                                                                                                                         |
|                                       | X = BHQ-1-dT                                                                       |                                                                                                                                                                                                                                                                                                                                                                                         |
| <b>FlaB B. miyamotoi</b>              | ± 155bp                                                                            | reference: Hovius, J.W.R.; de Wever, B.; Sohne, M.; Brouwer, M.C.; Coumou, J.; Wagemakers, A.; Oei, A.; Knol, H.; Narasimhan, S.; Hodiamont, C.J.; Jahfari, S.; Pals, S.T.; Horlings, H.M.; Fikrig, E.; Sprong, H.; van Oers, M.H.J. A case of meningoencephalitis by the relapsing fever spirochaete <i>Borrelia miyamotoi</i> in Europe. <i>Lancet</i> <b>2013</b> , <i>382</i> , 658 |
| F-primer :                            | 5'-AGA AGG TGC TCA AGC AG-3'                                                       |                                                                                                                                                                                                                                                                                                                                                                                         |
| R-primer:                             | 5'-TCG ATC TTT GAA AGT GAC ATA T-3'                                                |                                                                                                                                                                                                                                                                                                                                                                                         |
| Probe (Atto647N):                     | 5'- <b>ATTO647N</b> -AGC ACA ACA GGA GGG AGT TCA AGC- <b>BHQ2</b> -3'              |                                                                                                                                                                                                                                                                                                                                                                                         |

## IGS conventional PCR

|                                       |                                   |                                                                                                                                                                                                                                  |
|---------------------------------------|-----------------------------------|----------------------------------------------------------------------------------------------------------------------------------------------------------------------------------------------------------------------------------|
| <b>IGS primers</b>                    | ± 390-420bp                       |                                                                                                                                                                                                                                  |
| F-primer :                            | 5'-GAGTTCGCGGGAGAGTAGGTTATTGCC-3' | reference: Heylen, D.J.A.; Tijssse, E.; Fonville, M.; Matthysen, E.; Sprong, H. Transmission dynamics of <i>Borrelia burgdorferi</i> s.l. in a bird tick community. <i>Environ. Microbiol</i> <b>2013</b> , <i>15</i> , 663–673. |
| R-primer:                             | 5'-TCAGGGTACTTAGATGGTTCACTTCC-3'  |                                                                                                                                                                                                                                  |
| <b>IGS sequencing - short primers</b> |                                   |                                                                                                                                                                                                                                  |
| F-primer :                            | 5'-GCGGGAGAGGTTATTGCC-3'          |                                                                                                                                                                                                                                  |
| R-primer:                             | 5'-GTACTTAGATGGTTCACTTCC-3'       |                                                                                                                                                                                                                                  |

| <b>IGS PCR protocol</b> | temperature (°C) | Time (hh:mm:ss) | Cycles                   |
|-------------------------|------------------|-----------------|--------------------------|
| Taq activation          | 94               | 0:15:00         | 1                        |
| Denaturation            | 94               | 0:00:20         | 10                       |
| Annealing               | 70               | 0:00:30         | (lowering 1°C per cycle) |
| Elongation              | 72               | 0:00:30         |                          |
| Denaturation            | 94               | 0:00:20         | 40                       |
| Annealing               | 60               | 0:00:30         |                          |
| Elongation              | 72               | 0:00:30         |                          |
| Extension               | 72               | 0:07:00         | 1                        |
| Hold                    | 12               | forever         |                          |

## FlaB conventional PCR

|                     |                                |                                                                                                                                                                                                                                                  |
|---------------------|--------------------------------|--------------------------------------------------------------------------------------------------------------------------------------------------------------------------------------------------------------------------------------------------|
| <b>FlaB primers</b> | ± 497 bp                       |                                                                                                                                                                                                                                                  |
| F-primer :          | 5'-AARGAATTGGCAGTTCAATC-3'     | reference: Clark, K.; Hendricks, A.; Burge, D. Molecular identification and analysis of <i>Borrelia burgdorferi</i> sensu lato in lizards in the southeastern United States. <i>Appl Environ Microbiol</i> . <b>2005</b> , <i>71</i> , 2616-2625 |
| R-primer:           | 5'-GCATTTCWATTTTAGCAAGTGATG-3' |                                                                                                                                                                                                                                                  |

| <b>FlaB PCR protocol</b> | temperature (°C) | Time (hh:mm:ss) | Cycles |
|--------------------------|------------------|-----------------|--------|
| Taq activation           | 96               | 0:05:00         | 1      |
| Denaturation             | 95               | 0:00:30         | 30     |
| Annealing                | 52               | 0:00:30         |        |
| Elongation               | 72               | 0:01:00         |        |
| Extension                | 72               | 0:10:00         | 1      |
| Hold                     | 12               | forever         |        |

## ospC conventional nested PCR

|                           |                                       |                                                                                                                                                                                                                                                                                                                   |
|---------------------------|---------------------------------------|-------------------------------------------------------------------------------------------------------------------------------------------------------------------------------------------------------------------------------------------------------------------------------------------------------------------|
| <b>ospC outer primers</b> | ± 657 bp                              |                                                                                                                                                                                                                                                                                                                   |
| F-primer :                | 5'-ATGAAAAAGAATACATTAAGTGC-3'         | reference: Bunikis, J.; Garpmo, U.; Tsao, J.; Berglund, J.; Fish, D.; Barbour, AG. Sequence typing reveals extensive strain diversity of the Lyme borreliosis agents <i>Borrelia burgdorferi</i> in North America and <i>Borrelia afzelii</i> in Europe. <i>Microbiology</i> <b>2004</b> , <i>150</i> , 1741–1755 |
| R-primer:                 | 5'-ATTAATCTTATAATATTGATTTTAAATGAAG-3' |                                                                                                                                                                                                                                                                                                                   |
| <b>ospC inner primers</b> | ± 617 bp                              |                                                                                                                                                                                                                                                                                                                   |
| F-primer :                | 5'-TATTAATGACTTTATTTTATTTATATCT-3'    |                                                                                                                                                                                                                                                                                                                   |
| R-primer:                 | 5'-TTGATTTTAATTAAGGTTTTTTTGG-3'       |                                                                                                                                                                                                                                                                                                                   |

| <b>ospC 1st PCR protocol</b>    | temperature (°C) | Time (hh:mm:ss) | Cycles |
|---------------------------------|------------------|-----------------|--------|
| Taq activation                  | 95               | 0:05:00         | 1      |
| Denaturation                    | 94               | 0:00:30         | 35     |
| Annealing                       | 52               | 0:00:30         |        |
| Elongation                      | 74               | 0:00:30         |        |
| Extension                       | 72               | 0:10:00         | 1      |
| Hold                            | 12               | forever         |        |
| <b>ospC nested PCR protocol</b> | temperature (°C) | Time (hh:mm:ss) | Cycles |
| Taq activation                  | 95               | 0:05:00         | 1      |
| Denaturation                    | 94               | 0:00:30         | 25     |
| Annealing                       | 52               | 0:00:30         |        |
| Elongation                      | 74               | 0:00:30         |        |
| Extension                       | 72               | 0:10:00         | 1      |
| Hold                            | 12               | forever         |        |

|                                  |                                     |                                                                                                                                                                                                                                                                                                                               |
|----------------------------------|-------------------------------------|-------------------------------------------------------------------------------------------------------------------------------------------------------------------------------------------------------------------------------------------------------------------------------------------------------------------------------|
| <b>ospA species specific PCR</b> |                                     |                                                                                                                                                                                                                                                                                                                               |
| <b>G1 primers set</b>            | ± 543 bp                            | reference: Demaerschalck, I.; Ben Messaoud, A.; De Kesel, M.; Hoyois, B.; Lobet, Y.; Hoet, P.; Bigaignon, G.; Bollen, A.; Godfroid, E. Simultaneous presence of different <i>Borrelia burgdorferi</i> genospecies in biological fluids of Lyme disease patients. <i>J Clin Microbiol</i> . <b>1995</b> , <i>33</i> , 602–608. |
| F-primer :                       | 5'-AACAAAGACGGCAAGTACGATCTAATT-3'   |                                                                                                                                                                                                                                                                                                                               |
| R-primer:                        | 5'-TTACAGTAATTGTAAAGTTGAAGTGCC-3'   |                                                                                                                                                                                                                                                                                                                               |
| <b>GII primers set</b>           | ± 344 bp                            |                                                                                                                                                                                                                                                                                                                               |
| F-primer :                       | 5'-TGATAAAACAACGGTCTGGAAC-3'        |                                                                                                                                                                                                                                                                                                                               |
| R-primer:                        | 5'-GTAACITTCATGTTGTTGTTGCCG-3'      |                                                                                                                                                                                                                                                                                                                               |
| <b>GIII primers set</b>          | ± 189 bp                            |                                                                                                                                                                                                                                                                                                                               |
| F-primer :                       | 5'-TAAAGACAAAACATCAACAGATGAAATG-3'  |                                                                                                                                                                                                                                                                                                                               |
| R-primer:                        | 5'-TTCCAATGTTACTTTATCATTAGCTACTT-3' |                                                                                                                                                                                                                                                                                                                               |

| <b>ospA PCR protocol</b> | temperature (°C) | Time (hh:mm:ss) | Cycles |
|--------------------------|------------------|-----------------|--------|
| Taq activation           | 95               | 0:05:00         | 1      |
| Denaturation             | 95               | 0:00:30         | 35     |
| Annealing                | 55               | 0:00:30         |        |
| Elongation               | 72               | 0:01:00         |        |
| Extension                | 72               | 0:10:00         | 1      |
| Hold                     | 12               | forever         |        |
