# Supplementary material for: Hedgehogs, Squirrels, and Blackbirds as Sentinel Hosts for Active Surveillance of Borrelia miyamotoi and Borrelia burgdorferi Complex in Urban and Rural Environments
Source: MDPI journal article supplement (doi:10.3390/microorganisms8121908), 2020-11-30
Supplement: s1 [file s1]

Table S8: *Turdus merula* – combinations of *Borrelia burgdorferi* s.l. genospecies found in animals with mixed infections

| Number of specimens | <i>B. afzelii</i> | <i>B. garinii</i> | <i>B. valaisiana</i> |
|---------------------|-------------------|-------------------|----------------------|
| 2                   | X                 | X                 |                      |
| 4                   |                   | X                 | X                    |
