# Supplementary material for: Hedgehogs, Squirrels, and Blackbirds as Sentinel Hosts for Active Surveillance of Borrelia miyamotoi and Borrelia burgdorferi Complex in Urban and Rural Environments
Source: MDPI journal article supplement (doi:10.3390/microorganisms8121908), 2020-11-30
Supplement: s1 [file s1]

Table S6: *Erinaceus roumanicus* – combinations of *Borrelia burgdorferi* s.l. genospecies found in animals with mixed infections

| Number of specimens | <i>B. afzelii</i> | <i>B. garinii</i> | <i>B. burgdorferi</i> s.s. |
|---------------------|-------------------|-------------------|----------------------------|
| 1                   | X                 | X                 |                            |
| 2                   | X                 |                   | X                          |
| 3                   | X                 | X                 | X                          |
