# Supplementary material for: Hedgehogs, Squirrels, and Blackbirds as Sentinel Hosts for Active Surveillance of Borrelia miyamotoi and Borrelia burgdorferi Complex in Urban and Rural Environments
Source: MDPI journal article supplement (doi:10.3390/microorganisms8121908), 2020-11-30
Supplement: s1 [file s1]

Table S4: *Borrelia burgdorferi* s.l.-positive animals databaseEE = *Eriaceus europaeus*, ER = *Eriaceus roumanicus*, SV = *Sciurus vulgaris*, TM = *Turdus merula*

| animal | ear  | skin | muscle  | blood | lungs | liver   | spleen  | urinary bladder | kidney     | brain   | results                             |
|--------|------|------|---------|-------|-------|---------|---------|-----------------|------------|---------|-------------------------------------|
| 2 ER   | 1    | -    | 1, 2, 4 | -     | -     | -       | -       | 2, 4            | -          | -       | mix infection 1, 2, 4               |
| 4 ER   | NI   | -    | 0       | 0     | 0     | 0       | 0       | 0               | 0          | 0       | not identified                      |
| 5 ER   | NI   | -    | 0       | 0     | 0     | 0       | 0       | 0               | 0          | 0       | not identified                      |
| 6 TM   | -    | 6    | 0       | 0     | -     | -       | -       | -               | -          | 0       | <i>B. valaisiana</i>                |
| 7 EE   | 1, 7 | -    | 2, 5    | 4, 7  | 0     | 1       | 0       | 1, 2            | 1          | 1       | mix infection 1, 2, 4, 5, 7         |
| 8 ER   | 0    | -    | 0       | 0     | 0     | 0       | 0       | 1, 2            | 0          | 0       | mix infection 1, 2                  |
| 10 TM  | -    | 6    | 0       | 0     | -     | 0       | -       | -               | -          | 0       | <i>B. valaisiana</i>                |
| 11 TM  | -    | 0    | 0       | -     | -     | 0       | -       | -               | -          | 2       | <i>B. garinii</i>                   |
| 12 SV  | 2    | -    | 0       | 0     | 0     | 0       | 0       | 1, 2            | 0          | 0       | mix infection 1, 2                  |
| 14 ER  | 0    | -    | 1, 4    | 0     | 0     | 0       | 0       | 4               | 0          | 0       | mix infection 1, 4                  |
| 17 EE  | 1    | -    | 0       | 0     | 0     | 0       | 0       | 0               | 0          | 0       | <i>B. afzelii</i>                   |
| 18 TM  | -    | 2    | 0       | 0     | -     | NI      | -       | -               | -          | 0       | <i>B. garinii</i>                   |
| 20 TM  | -    | 2    | 0       | 0     | -     | 0       | -       | -               | -          | 0       | <i>B. garinii</i>                   |
| 21 SV  | 0    | -    | 0       | 0     | 0     | 0       | 0       | NI              | 0          | 0       | not identified                      |
| 22 SV  | 4    | -    | NI      | 0     | 0     | 0       | 0       | 0               | 0          | 0       | <i>B. burgdorferi</i> sensu stricto |
| 23 SV  | 4    | -    | NI      | -     | 4     | 2       | NI      | -               | 0          | -       | mix infection 2, 4                  |
| 24 EE  | NI   | -    | 5       | 0     | 0     | 0       | 0       | 0               | 0          | 0       | <i>B. spielmanni</i>                |
| 25 TM  | -    | 6    | 0       | -     | -     | -       | -       | -               | -          | 0       | <i>B. valaisiana</i>                |
| 26 TM  | -    | 2    | 2       | 0     | -     | 0       | -       | -               | -          | 0       | <i>B. garinii</i>                   |
| 28 TM  | -    | 2    | 0       | 0     | -     | 0       | -       | -               | -          | 0       | <i>B. garinii</i>                   |
| 30 SV  | 1, 2 | -    | 2, 4    | 1, 4  | 1, 2  | 7       | 2       | 4               | 4          | 4       | mix infection 1, 2, 4, 7            |
| 31 SV  | 1    | -    | 0       | 0     | 0     | 0       | 0       | 0               | 0          | 0       | <i>B. afzelii</i>                   |
| 32 EE  | NI   | -    | 1       | 1, 4  | 4     | 0       | 0       | 0               | 0          | 0       | mix infection 1, 4                  |
| 33 TM  | -    | 0    | 1, 2    | 0     | -     | 0       | -       | -               | -          | 0       | mix infection 1, 2                  |
| 34 EE  | NI   | -    | 1       | 0     | 0     | 0       | 0       | 0               | 0          | 0       | <i>B. afzelii</i>                   |
| 35 TM  | -    | 6    | 0       | 0     | -     | 0       | -       | -               | -          | 0       | <i>B. valaisiana</i>                |
| 36 TM  | -    | 0    | NI      | 0     | -     | 0       | -       | -               | -          | 0       | not identified                      |
| 37 TM  | -    | 6    | 0       | 0     | -     | 0       | -       | -               | -          | 0       | <i>B. valaisiana</i>                |
| 38 TM  | -    | 2, 6 | 0       | 0     | -     | 0       | -       | -               | -          | 0       | mix infection 2, 6                  |
| 40 SV  | 4    | -    | 0       | 0     | 0     | 0       | NI      | 0               | 0          | 0       | <i>B. burgdorferi</i> sensu stricto |
| 41 SV  | 4    | -    | 0       | 0     | 0     | 0       | 0       | 0               | 0          | 0       | <i>B. burgdorferi</i> sensu stricto |
| 42 TM  | -    | 6    | 0       | 0     | -     | 0       | -       | -               | -          | 0       | <i>B. valaisiana</i>                |
| 43 TM  | -    | 2    | 0       | 0     | -     | 0       | -       | -               | -          | 0       | <i>B. garinii</i>                   |
| 44 TM  | -    | 1    | 0       | 0     | -     | 0       | -       | -               | -          | 0       | <i>B. afzelii</i>                   |
| 45 EE  | 2, 5 | -    | NI      | 0     | 0     | 2       | 0       | 0               | 0          | 0       | mix infection 2, 3, 5               |
| 46 EE  | 0    | -    | 0       | 0     | 0     | 2       | 0       | 0               | 0          | 0       | <i>B. garinii</i>                   |
| 47 EE  | 5    | -    | 5       | 0     | 0     | 0       | 0       | 5               | 0          | 0       | <i>B. spielmanni</i>                |
| 48 EE  | 1, 2 | -    | 1       | 0     | 0     | 0       | 0       | 0               | 0          | 0       | mix infection 1, 2                  |
| 49 EE  | NI   | -    | 1       | NI    | NI    | NI      | 0       | 1               | 1          | 0       | <i>B. afzelii</i>                   |
| 50 EE  | 0    | -    | 2       | -     | 0     | -       | -       | 2               | -          | -       | <i>B. garinii</i>                   |
| 51 SV  | 4    | -    | NI      | -     | 2     | -       | -       | -               | -          | -       | mix infection 2, 4                  |
| 52 SV  | 4    | -    | NI      | 0     | 4     | 0       | 0       | -               | 0          | -       | <i>B. burgdorferi</i> sensu stricto |
| 53 SV  | NI   | -    | 0       | 0     | 2     | 0       | NI      | 0               | 0          | -       | <i>B. garinii</i>                   |
| 56 EE  | NI   | -    | 0       | 0     | 3     | 0       | 0       | -               | 0          | 0       | <i>B. bavariensis</i>               |
| 58 ER  | 0    | -    | 0       | 0     | 0     | NI      | 0       | 0               | 0          | -       | not identified                      |
| 59 TM  | -    | 1, 2 | 0       | -     | -     | NI      | -       | -               | -          | 2       | mix infection 1, 2                  |
| 60 TM  | -    | 6    | 0       | -     | -     | -       | -       | -               | -          | -       | <i>B. valaisiana</i>                |
| 62 EE  | 3    | -    | NI      | NI    | 0     | 0       | NI      | 3               | NI         | 0       | <i>B. bavariensis</i>               |
| 65 EE  | 0    | -    | 0       | -     | -     | -       | -       | 3               | 0          | -       | <i>B. bavariensis</i>               |
| 66 EE  | 1    | -    | 1       | 0     | 0     | 0       | -       | -               | 0          | 0       | <i>B. afzelii</i>                   |
| 68 TM  | -    | 6    | 0       | 0     | -     | 0       | -       | -               | -          | -       | <i>B. valaisiana</i>                |
| 69 TM  | -    | 0    | 0       | 0     | -     | NI      | -       | -               | -          | 0       | not identified                      |
| 72 TM  | -    | 2    | 0       | -     | -     | -       | -       | -               | -          | 0       | <i>B. garinii</i>                   |
| 73 TM  | -    | 6    | 0       | 0     | -     | 0       | -       | -               | -          | 0       | <i>B. valaisiana</i>                |
| 74 TM  | -    | 2    | 0       | 0     | -     | 0       | -       | -               | -          | 6       | mix infection 2, 6                  |
| 75 TM  | -    | 2    | 0       | 0     | -     | 0       | -       | -               | -          | 0       | <i>B. garinii</i>                   |
| 77 TM  | -    | 2, 6 | -       | -     | -     | -       | -       | -               | -          | -       | mix infection 2, 6                  |
| 78 TM  | -    | 6    | 0       | -     | -     | 0       | -       | -               | -          | NI      | <i>B. valaisiana</i>                |
| 80 EE  | 1    | -    | 1, 6    | 1, 4  | NI    | NI      | NI      | 1, 4            | NI         | 4       | mix infection 1, 4, 6               |
| 81 ER  | 1    | -    | 2, 4    | -     | 4     | 4       | 1, 4    | 1, 2, 4         | 1          | NI      | mix infection 1, 2, 4               |
| 82 EE  | 0    | -    | 0       | 0     | 0     | 0       | 0       | 2               | 0          | 0       | <i>B. garinii</i>                   |
| 83 EE  | 0    | -    | 0       | 0     | 0     | 0       | 0       | NI              | 0          | 0       | not identified                      |
| 84 EE  | 0    | -    | 0       | 0     | 0     | 0       | 0       | 3               | 0          | 0       | <i>B. bavariensis</i>               |
| 85 EE  | NI   | -    | 1       | 0     | 1     | NI      | 1       | 1               | NI         | 6       | mix infection 1, 6                  |
| 86 ER  | NI   | -    | 1, 4    | 4     | 4     | 0       | 1, 4    | 1               | 4          | 4       | mix infection 1, 4                  |
| 87 EE  | 5    | -    | 5       | 0     | 0     | 2       | 1       | 2, 4            | 1, 2, 4, 5 | 0       | mix infection 1, 2, 4, 5            |
| 88 EE  | 5    | -    | 0       | 0     | 0     | 0       | 0       | 0               | 0          | 0       | <i>B. spielmanni</i>                |
| 90 EE  | 0    | -    | NI      | -     | -     | -       | NI      | 0               | -          | -       | not identified                      |
| 91 EE  | NI   | -    | 0       | 0     | 0     | 0       | 0       | 0               | 0          | 0       | not identified                      |
| 92 EE  | 1    | -    | 1, 2    | 4     | NI    | NI      | 1, 4    | 1               | NI         | 4       | mix infection 1, 2, 4               |
| 93 EE  | NI   | -    | 0       | 0     | 0     | 0       | 0       | 0               | 0          | 0       | not identified                      |
| 94 EE  | 1, 3 | -    | 0       | 0     | 0     | 1       | 0       | 0               | 0          | 0       | mix infection 1, 3                  |
| 95 EE  | NI   | -    | 1       | 4     | 4     | 2, 4    | NI      | 1               | 4          | 1       | mix infection 1, 2, 4               |
| 96 EE  | NI   | -    | -       | -     | -     | -       | -       | -               | -          | -       | not identified                      |
| 97 TM  | -    | 0    | 1       | -     | -     | 0       | -       | -               | -          | 0       | <i>B. afzelii</i>                   |
| 98 EE  | NI   | -    | 0       | -     | -     | -       | -       | -               | 0          | -       | not identified                      |
| 99 EE  | NI   | -    | -       | -     | -     | -       | -       | -               | -          | -       | not identified                      |
| 100 TM | -    | 2    | 0       | 0     | -     | 0       | -       | -               | -          | 0       | <i>B. garinii</i>                   |
| 101 TM | -    | 2, 6 | 0       | 0     | -     | 0       | -       | -               | -          | 0       | mix infection 2, 6                  |
| 106 TM | -    | 1    | 0       | 0     | -     | 0       | -       | -               | -          | 0       | <i>B. afzelii</i>                   |
| 107 TM | -    | 6    | NI      | 0     | -     | 0       | -       | -               | -          | 0       | <i>B. valaisiana</i>                |
| 111 TM | -    | 6    | 0       | 0     | -     | 0       | -       | -               | -          | 0       | <i>B. valaisiana</i>                |
| 112 EE | 1    | -    | 0       | 0     | 0     | 0       | 0       | 0               | 0          | NI      | <i>B. afzelii</i>                   |
| 114 TM | -    | NI   | 0       | 0     | -     | -       | -       | -               | -          | 0       | not identified                      |
| 116 TM | -    | 2    | 0       | 0     | -     | NI      | -       | -               | -          | NI      | <i>B. garinii</i>                   |
| 117 TM | -    | 3    | 0       | -     | -     | 0       | -       | -               | -          | 0       | <i>B. bavariensis</i>               |
| 119 EE | 1    | -    | 1       | 0     | NI    | 1       | 5       | 1, 5            | 1          | 0       | mix infection 1, 5                  |
| 120 EE | 5    | -    | 1, 3    | 0     | 0     | 0       | 0       | 0               | 0          | 1       | mix infection 1, 3, 5               |
| 121 EE | NI   | -    | NI      | 0     | 0     | NI      | 0       | 4, 5            | 5          | NI      | mix infection 4, 5                  |
| 122 EE | 1, 3 | -    | 1, 2    | 0     | 4     | 5       | 1       | 1, 2            | NI         | 0       | mix infection 1, 2, 3, 4, 5         |
| 123 SV | NI   | -    | 4       | 0     | 0     | 0       | 0       | NI              | 0          | -       | <i>B. burgdorferi</i> sensu stricto |
| 124 SV | NI   | -    | 0       | 0     | 0     | 0       | 0       | NI              | 0          | 0       | not identified                      |
| 125 SV | 0    | -    | 0       | -     | -     | 4       | -       | -               | -          | -       | <i>B. burgdorferi</i> sensu stricto |
| 126 EE | 1    | -    | NI      | 0     | NI    | NI      | NI      | NI              | NI         | 0       | <i>B. afzelii</i>                   |
| 127 EE | NI   | -    | 2, 5    | 0     | 5     | 1       | 0       | NI              | 0          | 0       | mix infection 1, 2, 5               |
| 128 TM | -    | 1    | 0       | 0     | -     | 0       | -       | -               | -          | 0       | <i>B. afzelii</i>                   |
| 129 EE | 1    | -    | 1       | -     | NI    | -       | NI      | 1               | NI         | -       | <i>B. afzelii</i>                   |
| 131 EE | 1    | -    | 1       | 0     | 1     | 1       | NI      | 1               | 1          | NI      | <i>B. afzelii</i>                   |
| 132 EE | NI   | -    | NI      | 0     | 0     | 0       | 0       | NI              | NI         | 0       | not identified                      |
| 133 EE | NI   | -    | 4       | 0     | NI    | NI      | NI      | 0               | NI         | 0       | <i>B. burgdorferi</i> sensu stricto |
| 134 EE | 1    | -    | 0       | 0     | 0     | 0       | NI      | NI              | 0          | 0       | <i>B. afzelii</i>                   |
| 135 EE | 1    | -    | 1       | 0     | 0     | 0       | 0       | 0               | 0          | 0       | <i>B. afzelii</i>                   |
| 136 SV | NI   | -    | 0       | 0     | 0     | 0       | 0       | 4               | 0          | 0       | <i>B. burgdorferi</i> sensu stricto |
| 137 EE | NI   | -    | 0       | 0     | 0     | 0       | 0       | 0               | 0          | 0       | not identified                      |
| 140 EE | 3    | -    | NI      | 3     | 3     | NI      | 3       | 3, 4            | 3          | 1, 3, 4 | mix infection 1, 3, 4               |
| 141 EE | 3    | -    | 0       | 0     | 0     | 0       | NI      | 0               | 0          | NI      | <i>B. bavariensis</i>               |
| 142 EE | 1, 5 | -    | 1, 5    | 0     | 4, 7  | 1, 2, 3 | 1, 4, 7 | 1, 3, 4         | 2          | 1       | mix infection 1, 2, 3, 4, 5, 7      |
| 143 EE | 1    | -    | 1       | 0     | 1, 4  | NI      | 4, 7    | -               | 1, 5       | 3       | mix infection 1, 3, 4, 5, 7         |
| 144 EE | 1    | -    | NI      | 0     | 0     | 0       | 0       | -               | NI         | 1       | <i>B. afzelii</i>                   |
| 145 TM | -    | NI   | NI      | 0     | -     | 0       | -       | -               | -          | 0       | not identified                      |
| 146 SV | NI   | -    | NI      | 0     | 0     | 0       | 0       | 0               | 0          | 0       | not identified                      |
| 147 TM | -    | NI   | 0       | -     | -     | 0       | -       | -               | -          | 0       | not identified                      |
| 150 TM | -    | 2    | 0       | 0     | -     | 0       | -       | -               | -          | 0       | <i>B. garinii</i>                   |
| 153 ER | NI   | -    | 0       | -     | -     | -       | 0       | 0               | -          | 0       | not identified                      |
| 154 EE | NI   | -    | 0       | 0     | 0     | 0       | 0       | NI              | 0          | 0       | not identified                      |
| 155 ER | NI   | -    | 1, 2    | 0     | 0     | 0       | 0       | 0               | 0          | 4       | mix infection 1, 2, 4               |
| 157 TM | -    | NI   | 0       | 0     | -     | 0       | -       | -               | -          | 0       | not identified                      |
| 159 EE | NI   | -    | 5       | 0     | 0     | 0       | 5       | NI              | 0          | NI      | <i>B. spielmanni</i>                |
| 160 ER | NI   | -    | NI      | 0     | 0     | 0       | 0       | 0               | 0          | 0       | not identified                      |
| 162 SV | NI   | -    | 0       | 0     | NI    | 0       | 0       | 0               | 0          | 0       | not identified                      |
| 163 SV | NI   | -    | 0       | 0     | 0     | 0       | 0       | 0               | 0          | 0       | not identified                      |
| 164 SV | NI   | -    | 0       | 0     | 0     | 0       | 0       | 0               | 0          | 0       | not identified                      |
| 165 SV | NI   | -    | 0       | 0     | 0     | 0       | 0       | 0               | 0          | 0       | not identified                      |
| 166 EE | 1    | -    | 0       | -     | -     | -       | -       | -               | 0          | -       | <i>B. afzelii</i>                   |
| 167 EE | 4    | -    | 0       | -     | -     | -       | -       | -               | -          | -       | <i>B. burgdorferi</i> sensu stricto |
| 169 TM | -    | NI   | 0       | 0     | -     | 0       | -       | -               | -          | 0       | not identified                      |

1 = *B. afzelii*  
2 = *B. garinii*  
3 = *B. bavariensis*  
4 = *B. burgdorferi* s.s.  
5 = *B. spielmanni*  
6 = *B. valaisiana*  
7 = *B. carolinensis/bissetti*  
- tissue not obtained  
0 = negative qPCR result  
NI = positive qPCR, but genospecies not identified
