# Supplementary material for: Hedgehogs, Squirrels, and Blackbirds as Sentinel Hosts for Active Surveillance of Borrelia miyamotoi and Borrelia burgdorferi Complex in Urban and Rural Environments
Source: MDPI journal article supplement (doi:10.3390/microorganisms8121908), 2020-11-30
Supplement: s1 [file s1]

|       |    |       |       |   |      |   |    |     |    |            |               |               |    |
|-------|----|-------|-------|---|------|---|----|-----|----|------------|---------------|---------------|----|
| 17 EE | 1  | 38,11 | 34,21 | - | 1    | F | Ad | 657 | 37 | 23.07.2017 | 49°25'23.087" | 16°21'8.248"  | 1A |
| 17 EE | 3  | -     | -     | - |      |   |    |     |    |            |               |               |    |
| 17 EE | 4  | -     | -     | - |      |   |    |     |    |            |               |               |    |
| 17 EE | 5  | -     | -     | - |      |   |    |     |    |            |               |               |    |
| 17 EE | 6  | -     | -     | - |      |   |    |     |    |            |               |               |    |
| 17 EE | 7  | -     | -     | - |      |   |    |     |    |            |               |               |    |
| 17 EE | 8  | -     | -     | - |      |   |    |     |    |            |               |               |    |
| 17 EE | 9  | -     | -     | - |      |   |    |     |    |            |               |               |    |
| 17 EE | 10 | -     | -     | - |      |   |    |     |    |            |               |               |    |
| 18 TM | 2  | -     | 36,12 | - | 2    | F | Ad | 98  | 35 | 24.07.2017 | 49°25'23.087" | 16°21'8.248"  | 1A |
| 18 TM | 3  | -     | -     | - |      |   |    |     |    |            |               |               |    |
| 18 TM | 4  | -     | -     | - |      |   |    |     |    |            |               |               |    |
| 18 TM | 6  | -     | 36,13 | - | NI   |   |    |     |    |            |               |               |    |
| 18 TM | 10 | -     | -     | - |      |   |    |     |    |            |               |               |    |
| 19 TM | 2  | -     | -     | - |      | F | Ad | 80  | 34 | 04.07.2017 | 49°12'48.180" | 16°35'33.407" | 1B |
| 19 TM | 3  | -     | -     | - |      |   |    |     |    |            |               |               |    |
| 19 TM | 4  | -     | -     | - |      |   |    |     |    |            |               |               |    |
| 19 TM | 6  | -     | -     | - |      |   |    |     |    |            |               |               |    |
| 19 TM | 10 | -     | -     | - |      |   |    |     |    |            |               |               |    |
| 20 TM | 2  | 37,54 | 34,32 | - | 2    | F | Ad | 101 | 31 | 11.05.2017 | 49°17'15.635" | 16°27'24.082" | 1B |
| 20 TM | 3  | -     | -     | - |      |   |    |     |    |            |               |               |    |
| 20 TM | 4  | -     | -     | - |      |   |    |     |    |            |               |               |    |
| 20 TM | 6  | -     | -     | - |      |   |    |     |    |            |               |               |    |
| 20 TM | 10 | -     | -     | - |      |   |    |     |    |            |               |               |    |
| 21 SV | 1  | -     | -     | - |      | F | Ad | 384 | 52 | 28.07.2017 | 49°11'44.750" | 16°31'59.981" | 1A |
| 21 SV | 3  | -     | -     | - |      |   |    |     |    |            |               |               |    |
| 21 SV | 4  | -     | -     | - |      |   |    |     |    |            |               |               |    |
| 21 SV | 5  | -     | -     | - |      |   |    |     |    |            |               |               |    |
| 21 SV | 6  | -     | -     | - |      |   |    |     |    |            |               |               |    |
| 21 SV | 7  | -     | -     | - |      |   |    |     |    |            |               |               |    |
| 21 SV | 8  | -     | 35,8  | - | NI   |   |    |     |    |            |               |               |    |
| 21 SV | 9  | -     | -     | - |      |   |    |     |    |            |               |               |    |
| 21 SV | 10 | -     | -     | - |      |   |    |     |    |            |               |               |    |
| 22 SV | 1  | 35,93 | 33,93 | - | 4    | M | Ad | 312 | 49 | 22.03.2016 | 49°16'44.494" | 16°27'22.537" | 1A |
| 22 SV | 3  | 40,48 | 38,64 | - | NI   |   |    |     |    |            |               |               |    |
| 22 SV | 4  | -     | -     | - |      |   |    |     |    |            |               |               |    |
| 22 SV | 5  | -     | -     | - |      |   |    |     |    |            |               |               |    |
| 22 SV | 6  | -     | -     | - |      |   |    |     |    |            |               |               |    |
| 22 SV | 7  | -     | -     | - |      |   |    |     |    |            |               |               |    |
| 22 SV | 8  | -     | -     | - |      |   |    |     |    |            |               |               |    |
| 22 SV | 9  | -     | -     | - |      |   |    |     |    |            |               |               |    |
| 23 SV | 1  | 33,68 | 31,64 | - | 4    | M | Ad | 298 | 51 | 26.02.2016 | 49°17'15.635" | 16°27'24.082" | 2  |
| 23 SV | 3  | 40,96 | 38,1  | - | NI   |   |    |     |    |            |               |               |    |
| 23 SV | 5  | 35,93 | 33,69 | - | 4    |   |    |     |    |            |               |               |    |
| 23 SV | 6  | 37,56 | 33,62 | - | 2    |   |    |     |    |            |               |               |    |
| 23 SV | 7  | 37,41 | -     | - | NI   |   |    |     |    |            |               |               |    |
| 23 SV | 9  | -     | -     | - |      |   |    |     |    |            |               |               |    |
| 24 EE | 1  | 37,97 | 32,96 | - | NI   | M | Ad | 871 | 38 | 01.07.2017 | 49°3'55.973"  | 17°3'21.443"  | 2  |
| 24 EE | 3  | 39,23 | 34,09 | - | 5    |   |    |     |    |            |               |               |    |
| 24 EE | 4  | -     | -     | - |      |   |    |     |    |            |               |               |    |
| 24 EE | 5  | -     | -     | - |      |   |    |     |    |            |               |               |    |
| 24 EE | 6  | -     | -     | - |      |   |    |     |    |            |               |               |    |
| 24 EE | 7  | -     | -     | - |      |   |    |     |    |            |               |               |    |
| 24 EE | 8  | -     | -     | - |      |   |    |     |    |            |               |               |    |
| 24 EE | 9  | -     | -     | - |      |   |    |     |    |            |               |               |    |
| 24 EE | 10 | -     | -     | - |      |   |    |     |    |            |               |               |    |
| 25 TM | 2  | 32,78 | 29,49 | - | 6    | F | Ad | 63  | 32 | 08.08.2017 | 49°13'36.030" | 16°30'33.548" | 2  |
| 25 TM | 3  | -     | -     | - |      |   |    |     |    |            |               |               |    |
| 25 TM | 10 | -     | -     | - |      |   |    |     |    |            |               |               |    |
| 26 TM | 2  | 34,08 | 33,36 | - | 2    | F | Ad | 71  | 36 | 08.08.2017 | 49°13'3.392"  | 16°35'52.181" | 1B |
| 26 TM | 3  | 33,98 | 33,08 | - | 2    |   |    |     |    |            |               |               |    |
| 26 TM | 4  | -     | -     | - |      |   |    |     |    |            |               |               |    |
| 26 TM | 6  | -     | -     | - |      |   |    |     |    |            |               |               |    |
| 26 TM | 10 | -     | -     | - |      |   |    |     |    |            |               |               |    |
| 27 TM | 2  | -     | -     | - |      | F | Ad | 90  | 34 | 04.06.2017 | 49°11'38.457" | 15°49'45.003" | 1B |
| 27 TM | 3  | -     | -     | - |      |   |    |     |    |            |               |               |    |
| 27 TM | 4  | -     | -     | - |      |   |    |     |    |            |               |               |    |
| 27 TM | 6  | -     | -     | - |      |   |    |     |    |            |               |               |    |
| 27 TM | 10 | -     | -     | - |      |   |    |     |    |            |               |               |    |
| 28 TM | 2  | 35,15 | 30,39 | - | 2    | M | Ad | 56  | 29 | 11.08.2017 | 49°17'15.635" | 16°27'24.082" | 2  |
| 28 TM | 3  | -     | -     | - |      |   |    |     |    |            |               |               |    |
| 28 TM | 4  | -     | -     | - |      |   |    |     |    |            |               |               |    |
| 28 TM | 6  | -     | -     | - |      |   |    |     |    |            |               |               |    |
| 28 TM | 10 | -     | -     | - |      |   |    |     |    |            |               |               |    |
| 29 TM | 2  | -     | -     | - |      | M | Ad | 69  | 37 | 26.06.2017 | 48°58'41.647" | 14°26'49.180" | 1B |
| 29 TM | 3  | -     | -     | - |      |   |    |     |    |            |               |               |    |
| 29 TM | 4  | -     | -     | - |      |   |    |     |    |            |               |               |    |
| 29 TM | 6  | -     | -     | - |      |   |    |     |    |            |               |               |    |
| 29 TM | 10 | -     | -     | - |      |   |    |     |    |            |               |               |    |
| 30 SV | 1  | 25,89 | 22,59 | - | 1, 2 | F | Ad | 263 | 57 | 18.08.2017 | 49°12'34.2"   | 16°39'04.6"   | 1A |
| 30 SV | 3  | 29,96 | 27,66 | - | 2, 4 |   |    |     |    |            |               |               |    |
| 30 SV | 4  | 35,85 | 34,56 | - | 1, 4 |   |    |     |    |            |               |               |    |
| 30 SV | 5  | 32,39 | 29,49 | - | 1, 2 |   |    |     |    |            |               |               |    |
| 30 SV | 6  | 38,83 | 36,89 | - | 7    |   |    |     |    |            |               |               |    |
| 30 SV | 7  | 39,53 | -     | - | 2    |   |    |     |    |            |               |               |    |
| 30 SV | 8  | 36,99 | 34,46 | - | 4    |   |    |     |    |            |               |               |    |
| 30 SV | 9  | 38,82 | 36,38 | - | 4    |   |    |     |    |            |               |               |    |
| 30 SV | 10 | -     | 37,05 | - | 4    |   |    |     |    |            |               |               |    |
| 31 SV | 1  | 38,61 | 34,57 | - | 1    | F | Ad | 175 | 58 | 16.08.2017 | 49°12'33.600" | 16°35'10.544" | 1B |
| 31 SV | 3  | -     | -     | - |      |   |    |     |    |            |               |               |    |
| 31 SV | 4  | -     | -     | - |      |   |    |     |    |            |               |               |    |
| 31 SV | 5  | -     | -     | - |      |   |    |     |    |            |               |               |    |
| 31 SV | 6  | -     | -     | - |      |   |    |     |    |            |               |               |    |
| 31 SV | 7  | -     | -     | - |      |   |    |     |    |            |               |               |    |
| 31 SV | 8  | -     | -     | - |      |   |    |     |    |            |               |               |    |
| 31 SV | 9  | -     | -     | - |      |   |    |     |    |            |               |               |    |
| 31 SV | 10 | -     | -     | - |      |   |    |     |    |            |               |               |    |

|       |    |       |       |   |  |      |   |     |  |     |      |  |            |               |               |    |
|-------|----|-------|-------|---|--|------|---|-----|--|-----|------|--|------------|---------------|---------------|----|
| 32 EE | 1  | 36,98 | 31,52 | - |  | NI   | M | Ad  |  | 629 | 42   |  | 04.05.2017 | 49°1'10.9"    | 14°26'7.5"    | 1B |
| 32 EE | 3  | 33,51 | 30,28 | - |  | 1    |   |     |  |     |      |  |            |               |               |    |
| 32 EE | 4  |       | 36,88 | - |  | 1, 4 |   |     |  |     |      |  |            |               |               |    |
| 32 EE | 5  |       | 34,47 | - |  | 4    |   |     |  |     |      |  |            |               |               |    |
| 32 EE | 6  |       |       | - |  |      |   |     |  |     |      |  |            |               |               |    |
| 32 EE | 7  |       |       | - |  |      |   |     |  |     |      |  |            |               |               |    |
| 32 EE | 8  |       |       | - |  |      |   |     |  |     |      |  |            |               |               |    |
| 32 EE | 9  |       |       | - |  |      |   |     |  |     |      |  |            |               |               |    |
| 32 EE | 10 |       |       | - |  |      |   |     |  |     |      |  |            |               |               |    |
| 33 TM | 2  |       |       | - |  |      | M | Ad  |  | 84  | 40   |  | 12.08.2017 | 49°13'3.392"  | 16°35'52.181" | 2  |
| 33 TM | 3  | 39,52 |       | - |  | 1, 2 |   |     |  |     |      |  |            |               |               |    |
| 33 TM | 4  |       |       | - |  |      |   |     |  |     |      |  |            |               |               |    |
| 33 TM | 6  |       |       | - |  |      |   |     |  |     |      |  |            |               |               |    |
| 33 TM | 10 |       |       | - |  |      |   |     |  |     |      |  |            |               |               |    |
| 34 EE | 1  | 39,78 |       | - |  | NI   | F | Ad  |  | 818 | 48   |  | 10.06.2017 | 49°17'40.774" | 16°20'45.750" | 1A |
| 34 EE | 3  |       | 40,05 | - |  | 1    |   |     |  |     |      |  |            |               |               |    |
| 34 EE | 4  |       |       | - |  |      |   |     |  |     |      |  |            |               |               |    |
| 34 EE | 5  |       |       | - |  |      |   |     |  |     |      |  |            |               |               |    |
| 34 EE | 6  |       |       | - |  |      |   |     |  |     |      |  |            |               |               |    |
| 34 EE | 7  |       |       | - |  |      |   |     |  |     |      |  |            |               |               |    |
| 34 EE | 8  |       |       | - |  |      |   |     |  |     |      |  |            |               |               |    |
| 34 EE | 9  |       |       | - |  |      |   |     |  |     |      |  |            |               |               |    |
| 34 EE | 10 |       |       | - |  |      |   |     |  |     |      |  |            |               |               |    |
| 35 TM | 2  | 35,48 | 32,77 | - |  | 6    | M | Ad  |  | 90  | 32   |  | 10.05.2017 | 48°58'07.80"  | 14°28'05.82"  | 1A |
| 35 TM | 3  |       |       | - |  |      |   |     |  |     |      |  |            |               |               |    |
| 35 TM | 4  |       |       | - |  |      |   |     |  |     |      |  |            |               |               |    |
| 35 TM | 6  |       |       | - |  |      |   |     |  |     |      |  |            |               |               |    |
| 35 TM | 10 |       |       | - |  |      |   |     |  |     |      |  |            |               |               |    |
| 36 TM | 2  |       |       | - |  |      | F | Ad  |  | 96  | 31   |  | 25.04.2017 | 48°58'6.525"  | 14°28'6.938"  | 2  |
| 36 TM | 3  |       | 37,74 | - |  | NI   |   |     |  |     |      |  |            |               |               |    |
| 36 TM | 4  |       |       | - |  |      |   |     |  |     |      |  |            |               |               |    |
| 36 TM | 6  |       |       | - |  |      |   |     |  |     |      |  |            |               |               |    |
| 36 TM | 10 |       |       | - |  |      |   |     |  |     |      |  |            |               |               |    |
| 37 TM | 2  | 34,77 | 30,7  | - |  | 6    | F | Ad  |  | 75  | 29   |  | 17.08.2017 | 49°13'3.392"  | 16°35'52.181" | 1A |
| 37 TM | 3  |       |       | - |  |      |   |     |  |     |      |  |            |               |               |    |
| 37 TM | 4  |       |       | - |  |      |   |     |  |     |      |  |            |               |               |    |
| 37 TM | 6  |       |       | - |  |      |   |     |  |     |      |  |            |               |               |    |
| 37 TM | 10 |       |       | - |  |      |   |     |  |     |      |  |            |               |               |    |
| 38 TM | 2  | 37,06 | 33,25 | - |  | 2, 6 | M | Ad  |  | 83  | 32   |  | 17.05.2017 | 49°3'39.78"   | 14°24'39.471" | 1B |
| 38 TM | 3  |       |       | - |  |      |   |     |  |     |      |  |            |               |               |    |
| 38 TM | 4  |       |       | - |  |      |   |     |  |     |      |  |            |               |               |    |
| 38 TM | 6  |       |       | - |  |      |   |     |  |     |      |  |            |               |               |    |
| 38 TM | 10 |       |       | - |  |      |   |     |  |     |      |  |            |               |               |    |
| 39 SV | 1  |       |       | - |  |      | M | Ad  |  | 345 | 45   |  | 09.05.2017 | 49°04'34.0"   | 14°31'52.2"   | 1A |
| 39 SV | 3  |       |       | - |  |      |   |     |  |     |      |  |            |               |               |    |
| 39 SV | 4  |       |       | - |  |      |   |     |  |     |      |  |            |               |               |    |
| 39 SV | 5  |       |       | - |  |      |   |     |  |     |      |  |            |               |               |    |
| 39 SV | 6  |       |       | - |  |      |   |     |  |     |      |  |            |               |               |    |
| 39 SV | 7  |       |       | - |  |      |   |     |  |     |      |  |            |               |               |    |
| 39 SV | 8  |       |       | - |  |      |   |     |  |     |      |  |            |               |               |    |
| 39 SV | 9  |       |       | - |  |      |   |     |  |     |      |  |            |               |               |    |
| 39 SV | 10 |       |       | - |  |      |   |     |  |     |      |  |            |               |               |    |
| 40 SV | 1  | 31,4  | 29,48 | - |  | 4    | M | Ad  |  | 344 | 59   |  | 31.03.2017 | 49°29'43.307" | 16°39'47.701" | 1A |
| 40 SV | 3  |       |       | - |  |      |   |     |  |     |      |  |            |               |               |    |
| 40 SV | 4  |       |       | - |  |      |   |     |  |     |      |  |            |               |               |    |
| 40 SV | 5  |       |       | - |  |      |   |     |  |     |      |  |            |               |               |    |
| 40 SV | 6  |       |       | - |  |      |   |     |  |     |      |  |            |               |               |    |
| 40 SV | 7  |       | 45,35 | - |  | NI   |   |     |  |     |      |  |            |               |               |    |
| 40 SV | 8  |       |       | - |  |      |   |     |  |     |      |  |            |               |               |    |
| 40 SV | 9  |       |       | - |  |      |   |     |  |     |      |  |            |               |               |    |
| 40 SV | 10 |       |       | - |  |      |   |     |  |     |      |  |            |               |               |    |
| 41 SV | 1  |       | 37,73 | - |  | 4    | M | Juv |  | 72  | 39   |  | 01.04.2017 | ARS Plzeň     | ARS Plzeň     | 1A |
| 41 SV | 3  |       |       | - |  |      |   |     |  |     |      |  |            |               |               |    |
| 41 SV | 4  |       |       | - |  |      |   |     |  |     |      |  |            |               |               |    |
| 41 SV | 5  |       |       | - |  |      |   |     |  |     |      |  |            |               |               |    |
| 41 SV | 6  |       |       | - |  |      |   |     |  |     |      |  |            |               |               |    |
| 41 SV | 7  |       |       | - |  |      |   |     |  |     |      |  |            |               |               |    |
| 41 SV | 8  |       |       | - |  |      |   |     |  |     |      |  |            |               |               |    |
| 41 SV | 9  |       |       | - |  |      |   |     |  |     |      |  |            |               |               |    |
| 41 SV | 10 |       |       | - |  |      |   |     |  |     |      |  |            |               |               |    |
| 42 TM | 2  | 36,25 | 33,91 | - |  | 6    | F | Ad  |  | 69  | 33   |  | 22.08.2017 | 49°12'51.360" | 16°38'14.775" | 2  |
| 42 TM | 3  |       |       | - |  |      |   |     |  |     |      |  |            |               |               |    |
| 42 TM | 4  |       |       | - |  |      |   |     |  |     |      |  |            |               |               |    |
| 42 TM | 6  |       |       | - |  |      |   |     |  |     |      |  |            |               |               |    |
| 42 TM | 10 |       |       | - |  |      |   |     |  |     |      |  |            |               |               |    |
| 43 TM | 2  | 34,93 | 29,94 | - |  | 2    | M | Ad  |  | 73  | 32,5 |  | 10.09.2017 | 49°13'3.392"  | 16°35'52.181" | 1A |
| 43 TM | 3  |       |       | - |  |      |   |     |  |     |      |  |            |               |               |    |
| 43 TM | 4  |       |       | - |  |      |   |     |  |     |      |  |            |               |               |    |
| 43 TM | 6  |       |       | - |  |      |   |     |  |     |      |  |            |               |               |    |
| 43 TM | 10 |       |       | - |  |      |   |     |  |     |      |  |            |               |               |    |
| 44 TM | 2  | 36,91 | 33,99 | - |  | 1    | F | Ad  |  | 70  | 31   |  | 22.09.2017 | 49°14'20.805" | 16°32'9.751"  | 1B |
| 44 TM | 3  |       |       | - |  |      |   |     |  |     |      |  |            |               |               |    |
| 44 TM | 4  |       |       | - |  |      |   |     |  |     |      |  |            |               |               |    |
| 44 TM | 6  |       |       | - |  |      |   |     |  |     |      |  |            |               |               |    |
| 44 TM | 10 |       |       | - |  |      |   |     |  |     |      |  |            |               |               |    |
| 45 EE | 1  | 27,31 | 24,22 | - |  | 2, 5 | M | Ad  |  | 478 | 34   |  | VIII 2017  | ARS Liberec   | ARS Liberec   | 1A |
| 45 EE | 3  | 37,52 | 35,19 | - |  | NI   |   |     |  |     |      |  |            |               |               |    |
| 45 EE | 4  |       |       | - |  |      |   |     |  |     |      |  |            |               |               |    |
| 45 EE | 5  |       |       | - |  |      |   |     |  |     |      |  |            |               |               |    |
| 45 EE | 6  | 33,04 | 28,47 | - |  | 3    |   |     |  |     |      |  |            |               |               |    |
| 45 EE | 7  |       |       | - |  |      |   |     |  |     |      |  |            |               |               |    |
| 45 EE | 8  |       |       | - |  |      |   |     |  |     |      |  |            |               |               |    |
| 45 EE | 9  |       |       | - |  |      |   |     |  |     |      |  |            |               |               |    |
| 45 EE | 10 |       |       | - |  |      |   |     |  |     |      |  |            |               |               |    |

|       |    |       |       |   |      |   |     |         |    |            |                |                |    |
|-------|----|-------|-------|---|------|---|-----|---------|----|------------|----------------|----------------|----|
| 46 EE | 1  | -     | -     | - | -    | F | Juv | 74      | 19 | VIII 2017  | ARS Liberec    | ARS Liberec    | 1B |
| 46 EE | 3  | -     | -     | - | -    |   |     |         |    |            |                |                |    |
| 46 EE | 4  | -     | -     | - | -    |   |     |         |    |            |                |                |    |
| 46 EE | 5  | -     | -     | - | -    |   |     |         |    |            |                |                |    |
| 46 EE | 6  | -     | 36,78 | - | 2    |   |     |         |    |            |                |                |    |
| 46 EE | 7  | -     | -     | - | -    |   |     |         |    |            |                |                |    |
| 46 EE | 8  | -     | -     | - | -    |   |     |         |    |            |                |                |    |
| 46 EE | 9  | -     | -     | - | -    |   |     |         |    |            |                |                |    |
| 46 EE | 10 | -     | -     | - | -    |   |     |         |    |            |                |                |    |
| 47 EE | 1  | 29,36 | -     | - | 5    | F | Ad  | 533     | 36 | 28.08.2017 | 48°59'33.101"  | 14°32'9.072"   | 1B |
| 47 EE | 3  | 34,83 | -     | - | 5    |   |     |         |    |            |                |                |    |
| 47 EE | 5  | -     | -     | - | -    |   |     |         |    |            |                |                |    |
| 47 EE | 6  | -     | -     | - | -    |   |     |         |    |            |                |                |    |
| 47 EE | 7  | -     | -     | - | -    |   |     |         |    |            |                |                |    |
| 47 EE | 8  | 37,15 | -     | - | 5    |   |     |         |    |            |                |                |    |
| 47 EE | 9  | -     | -     | - | -    |   |     |         |    |            |                |                |    |
| 48 EE | 1  | 40,92 | 38,82 | - | 1, 2 | M | Ad  | 1335    | 39 | 2017       | 48°58'23.181"  | 14°44'33.756"  | 1B |
| 48 EE | 3  | 37,22 | 35,15 | - | 1    |   |     |         |    |            |                |                |    |
| 48 EE | 4  | -     | -     | - | -    |   |     |         |    |            |                |                |    |
| 48 EE | 5  | -     | -     | - | -    |   |     |         |    |            |                |                |    |
| 48 EE | 6  | -     | -     | - | -    |   |     |         |    |            |                |                |    |
| 48 EE | 7  | -     | -     | - | -    |   |     |         |    |            |                |                |    |
| 48 EE | 8  | -     | -     | - | -    |   |     |         |    |            |                |                |    |
| 48 EE | 9  | -     | -     | - | -    |   |     |         |    |            |                |                |    |
| 48 EE | 10 | -     | -     | - | -    |   |     |         |    |            |                |                |    |
| 49 EE | 1  | 35,94 | 33,17 | - | NI   | F | Juv | 343     | 37 | 30.09.2017 | 49°45'16.224"  | 14°31'59.680"E | 1B |
| 49 EE | 3  | 30,02 | 26,86 | - | 1    |   |     |         |    |            |                |                |    |
| 49 EE | 4  | 37,35 | 33,25 | - | NI   |   |     |         |    |            |                |                |    |
| 49 EE | 5  | 38,51 | 33,97 | - | NI   |   |     |         |    |            |                |                |    |
| 49 EE | 6  | 34,53 | 31,95 | - | NI   |   |     |         |    |            |                |                |    |
| 49 EE | 7  | -     | -     | - | -    |   |     |         |    |            |                |                |    |
| 49 EE | 8  | 28,04 | 24,45 | - | 1    |   |     |         |    |            |                |                |    |
| 49 EE | 9  | 32,7  | 29,06 | - | 1    |   |     |         |    |            |                |                |    |
| 50 EE | 1  | -     | -     | - | -    | M | Ad  | 718     | 39 | 14.08.2017 | 48°57'44.526"  | 14°26'16.067"  | 2  |
| 50 EE | 3  | -     | 36,72 | - | 2    |   |     |         |    |            |                |                |    |
| 50 EE | 5  | -     | -     | - | -    |   |     |         |    |            |                |                |    |
| 50 EE | 8  | -     | 35,06 | - | 2    |   |     |         |    |            |                |                |    |
| 51 SV | 1  | 32,34 | 28,85 | - | 4    | F | Ad  | 256     | 46 | 30.08.2017 | 49°03'26.4"    | 14°26'15.5"    | 2  |
| 51 SV | 3  | 38,71 | 36,24 | - | NI   |   |     |         |    |            |                |                |    |
| 51 SV | 5  | 32,52 | 27,8  | - | 2    |   |     |         |    |            |                |                |    |
| 52 SV | 1  | 40,56 | 34,29 | - | 4    | M | Ad  | 368     | 51 | 24.09.2017 | 48°55'05.220"  | 14°30'03.780"  | 1A |
| 52 SV | 3  | 40,11 | -     | - | NI   |   |     |         |    |            |                |                |    |
| 52 SV | 4  | -     | -     | - | -    |   |     |         |    |            |                |                |    |
| 52 SV | 5  | 37,77 | 33,33 | - | 4    |   |     |         |    |            |                |                |    |
| 52 SV | 6  | -     | -     | - | -    |   |     |         |    |            |                |                |    |
| 52 SV | 7  | -     | -     | - | -    |   |     |         |    |            |                |                |    |
| 52 SV | 9  | -     | -     | - | -    |   |     |         |    |            |                |                |    |
| 53 SV | 1  | 39,49 | 34,67 | - | NI   | M | Ad  | 206     | 49 | 30.09.2017 | 49°03'40.0800" | 14°24'53.100"  | 2  |
| 53 SV | 3  | -     | -     | - | -    |   |     |         |    |            |                |                |    |
| 53 SV | 4  | -     | -     | - | -    |   |     |         |    |            |                |                |    |
| 53 SV | 5  | 38,79 | 34,24 | - | 2    |   |     |         |    |            |                |                |    |
| 53 SV | 6  | -     | -     | - | -    |   |     |         |    |            |                |                |    |
| 53 SV | 7  | -     | 38,02 | - | NI   |   |     |         |    |            |                |                |    |
| 53 SV | 8  | -     | -     | - | -    |   |     |         |    |            |                |                |    |
| 53 SV | 9  | -     | -     | - | -    |   |     |         |    |            |                |                |    |
| 54 TM | 2  | -     | -     | - | -    | M | Ad  | 79      | 34 | 12.04.2017 | 48°57'27"      | 14°28'12"      | 1B |
| 54 TM | 3  | -     | -     | - | -    |   |     |         |    |            |                |                |    |
| 54 TM | 4  | -     | -     | - | -    |   |     |         |    |            |                |                |    |
| 56 EE | 1  | 40    | -     | - | NI   | F | Ad  | 1187    | 38 | VIII 2017  | ARS Liberec    | ARS Liberec    | 1A |
| 56 EE | 3  | -     | -     | - | -    |   |     |         |    |            |                |                |    |
| 56 EE | 4  | -     | -     | - | -    |   |     |         |    |            |                |                |    |
| 56 EE | 5  | 42,07 | 36,13 | - | 3    |   |     |         |    |            |                |                |    |
| 56 EE | 6  | -     | -     | - | -    |   |     |         |    |            |                |                |    |
| 56 EE | 7  | -     | -     | - | -    |   |     |         |    |            |                |                |    |
| 56 EE | 9  | -     | -     | - | -    |   |     |         |    |            |                |                |    |
| 56 EE | 10 | -     | -     | - | -    |   |     |         |    |            |                |                |    |
| 57 EE | 1  | -     | -     | - | -    | M | Ad  | 1118    | 39 | VIII 2017  | ARS Liberec    | ARS Liberec    | 1A |
| 57 EE | 3  | -     | -     | - | -    |   |     |         |    |            |                |                |    |
| 57 EE | 4  | -     | -     | - | -    |   |     |         |    |            |                |                |    |
| 57 EE | 5  | -     | -     | - | -    |   |     |         |    |            |                |                |    |
| 57 EE | 6  | -     | -     | - | -    |   |     |         |    |            |                |                |    |
| 57 EE | 7  | -     | -     | - | -    |   |     |         |    |            |                |                |    |
| 57 EE | 8  | -     | -     | - | -    |   |     |         |    |            |                |                |    |
| 57 EE | 9  | -     | -     | - | -    |   |     |         |    |            |                |                |    |
| 57 EE | 10 | -     | -     | - | -    |   |     |         |    |            |                |                |    |
| 58 ER | 1  | -     | -     | - | -    | M | Ad  | 1005    | 33 | 02.04.2017 | 50°3'6.797"    | 14°25'21.164"  | 1B |
| 58 ER | 3  | -     | -     | - | -    |   |     |         |    |            |                |                |    |
| 58 ER | 4  | -     | -     | - | -    |   |     |         |    |            |                |                |    |
| 58 ER | 5  | -     | -     | - | -    |   |     |         |    |            |                |                |    |
| 58 ER | 6  | -     | 35,27 | - | NI   |   |     |         |    |            |                |                |    |
| 58 ER | 7  | -     | -     | - | -    |   |     |         |    |            |                |                |    |
| 58 ER | 8  | -     | -     | - | -    |   |     |         |    |            |                |                |    |
| 58 ER | 9  | -     | -     | - | -    |   |     |         |    |            |                |                |    |
| 59 TM | 2  | 42,6  | 32,93 | - | 1, 2 | F | Ad  | 59      | 34 | 2017       | ARS Plzeň      | ARS Plzeň      | 2  |
| 59 TM | 3  | -     | -     | - | NI   |   |     |         |    |            |                |                |    |
| 59 TM | 6  | -     | 35,36 | - | -    |   |     |         |    |            |                |                |    |
| 59 TM | 10 | -     | 35,01 | - | 2    |   |     |         |    |            |                |                |    |
| 60 TM | 2  | 36,51 | 32,2  | - | 6    | M | Ad  | 80      | 35 | 23.04.2017 | 48°51'07.6"    | 14°21'50.5"    | 2  |
| 60 TM | 3  | -     | -     | - | -    |   |     |         |    |            |                |                |    |
| 61 SV | 1  | -     | -     | - | -    | F | Ad  | 335     | 53 | 30.09.2017 | 49°15'18.493"  | 17°41'50.894"  | 1A |
| 61 SV | 3  | -     | -     | - | -    |   |     |         |    |            |                |                |    |
| 61 SV | 4  | -     | -     | - | -    |   |     |         |    |            |                |                |    |
| 61 SV | 5  | -     | -     | - | -    |   |     |         |    |            |                |                |    |
| 61 SV | 6  | -     | -     | - | -    |   |     |         |    |            |                |                |    |
| 61 SV | 7  | -     | -     | - | -    |   |     |         |    |            |                |                |    |
| 61 SV | 8  | -     | -     | - | -    |   |     |         |    |            |                |                |    |
| 61 SV | 9  | -     | -     | - | -    |   |     |         |    |            |                |                |    |
| 62 EE | 1  | 37,51 | 31,08 | - | 3    | M | Ad  | 772     | 38 | VIII 2017  | ARS Liberec    | ARS Liberec    | 1A |
| 62 EE | 3  | 32,94 | 26,78 | - | NI   |   |     |         |    |            |                |                |    |
| 62 EE | 4  | -     | 36,75 | - | NI   |   |     |         |    |            |                |                |    |
| 62 EE | 5  | -     | 34,76 | - | NI   |   |     |         |    |            |                |                |    |
| 62 EE | 6  | -     | -     | - | -    |   |     |         |    |            |                |                |    |
| 62 EE | 7  | -     | 36,35 | - | NI   |   |     |         |    |            |                |                |    |
| 62 EE | 8  | 26,25 | 20,1  | - | 3    |   |     |         |    |            |                |                |    |
| 62 EE | 9  | 39,05 | 35,53 | - | NI   |   |     |         |    |            |                |                |    |
| 62 EE | 10 | -     | -     | - | -    |   |     |         |    |            |                |                |    |
| 63 EE | 1  | -     | -     | - | -    | M | Ad  | 728     | 37 | 16.04.2017 | 48°57'58.3"    | 14°27'42.8"    | 2  |
| 63 EE | 3  | -     | -     | - | -    |   |     |         |    |            |                |                |    |
| 63 EE | 5  | -     | -     | - | -    |   |     |         |    |            |                |                |    |
| 64 EE | 1  | -     | -     | - | -    | ? | Ad  | cca 500 | 37 | 18.05.2017 | 48°56'17.8"    | 14°28'44.1"    | 2  |
| 64 EE | 3  | -     | -     | - | -    |   |     |         |    |            |                |                |    |
| 65 EE | 1  | -     | -     | - | -    | ? | Ad  | 722     | 36 | 22.06.2017 | 48°59'36.21"   | 14°32'30.44"   | 2  |
| 65 EE | 3  | -     | -     | - | -    |   |     |         |    |            |                |                |    |
| 65 EE | 8  | -     | 32,76 | - | 3    |   |     |         |    |            |                |                |    |
| 65 EE | 9  | -     | -     | - | -    |   |     |         |    |            |                |                |    |
| 66 EE | 1  | 35,96 | 32,34 | - | 1    | M | Ad  | 780     | 39 | 01.08.2017 | 49°45'16.224"  | 14°31'59.680"E | 1A |
| 66 EE | 3  | 34,6  | 31,09 | - | 1    |   |     |         |    |            |                |                |    |
| 66 EE | 4  | -     | -     | - | -    |   |     |         |    |            |                |                |    |
| 66 EE | 5  | -     | -     | - | -    |   |     |         |    |            |                |                |    |
| 66 EE | 6  | -     | -     | - | -    |   |     |         |    |            |                |                |    |
| 66 EE | 9  | -     | -     | - | -    |   |     |         |    |            |                |                |    |
| 66 EE | 10 | -     | -     | - | -    |   |     |         |    |            |                |                |    |

|       |    |       |       |   |   |            |   |     |     |    |            |               |               |    |
|-------|----|-------|-------|---|---|------------|---|-----|-----|----|------------|---------------|---------------|----|
| 67 TM | 2  | -     | -     | - | - | -          | F | Ad  | 89  | 33 | 25.09.2017 | 48°57'59.940" | 14°27'47.340" | 1B |
| 67 TM | 3  | -     | -     | - | - | -          |   |     |     |    |            |               |               |    |
| 67 TM | 6  | -     | -     | - | - | -          |   |     |     |    |            |               |               |    |
| 67 TM | 10 | -     | -     | - | - | -          |   |     |     |    |            |               |               |    |
| 68 TM | 2  | 38,24 | 32,71 | - | - | 6          | F | Ad  | 79  | 32 | 06.05.2017 | 50°55'24.000" | 11°34'59.400" | 1A |
| 68 TM | 3  | -     | -     | - | - | -          |   |     |     |    |            |               |               |    |
| 68 TM | 4  | -     | -     | - | - | -          |   |     |     |    |            |               |               |    |
| 68 TM | 6  | -     | -     | - | - | -          |   |     |     |    |            |               |               |    |
| 69 TM | 2  | -     | -     | - | - | -          | F | Ad  | 101 | 36 | 15.03.2017 | 50°1'6.806"   | 14°44'19.495" | 1A |
| 69 TM | 3  | -     | -     | - | - | -          |   |     |     |    |            |               |               |    |
| 69 TM | 4  | -     | -     | - | - | -          |   |     |     |    |            |               |               |    |
| 69 TM | 6  | -     | 35,15 | - | - | NI         |   |     |     |    |            |               |               |    |
| 69 TM | 10 | -     | -     | - | - | -          |   |     |     |    |            |               |               |    |
| 70 TM | 2  | -     | -     | - | - | -          | F | Ad  | 94  | 35 | 06.04.2017 | 50°1'6.806"   | 14°44'19.495" | 1A |
| 70 TM | 3  | -     | -     | - | - | -          |   |     |     |    |            |               |               |    |
| 70 TM | 4  | -     | -     | - | - | -          |   |     |     |    |            |               |               |    |
| 70 TM | 6  | -     | -     | - | - | -          |   |     |     |    |            |               |               |    |
| 70 TM | 10 | -     | -     | - | - | -          |   |     |     |    |            |               |               |    |
| 72 TM | 2  | -     | 37,37 | - | - | 2          | M | Ad  | 82  | 36 | 10.07.2017 | 48°58'31.44"  | 14°30'04.56"  | 2  |
| 72 TM | 3  | -     | -     | - | - | -          |   |     |     |    |            |               |               |    |
| 72 TM | 10 | -     | -     | - | - | -          |   |     |     |    |            |               |               |    |
| 73 TM | 2  | 39,26 | 32,59 | - | - | 6          | M | Ad  | 76  | 31 | VIII 2017  | ARS Liberec   | ARS Liberec   | 1A |
| 73 TM | 3  | -     | -     | - | - | -          |   |     |     |    |            |               |               |    |
| 73 TM | 4  | -     | -     | - | - | -          |   |     |     |    |            |               |               |    |
| 73 TM | 6  | -     | -     | - | - | -          |   |     |     |    |            |               |               |    |
| 73 TM | 10 | -     | -     | - | - | -          |   |     |     |    |            |               |               |    |
| 74 TM | 2  | 31,93 | 26,63 | - | - | 2          | F | Ad  | 77  | 32 | VIII 2017  | ARS Liberec   | ARS Liberec   | 1A |
| 74 TM | 3  | -     | -     | - | - | -          |   |     |     |    |            |               |               |    |
| 74 TM | 4  | -     | -     | - | - | -          |   |     |     |    |            |               |               |    |
| 74 TM | 6  | -     | -     | - | - | -          |   |     |     |    |            |               |               |    |
| 74 TM | 10 | 41,62 | 35,49 | - | - | 6          |   |     |     |    |            |               |               |    |
| 75 TM | 2  | 37,17 | 30,86 | - | - | 2          | F | Ad  | 75  | 34 | VIII 2017  | ARS Liberec   | ARS Liberec   | 1A |
| 75 TM | 3  | -     | -     | - | - | -          |   |     |     |    |            |               |               |    |
| 75 TM | 4  | -     | -     | - | - | -          |   |     |     |    |            |               |               |    |
| 75 TM | 6  | -     | -     | - | - | -          |   |     |     |    |            |               |               |    |
| 75 TM | 10 | -     | -     | - | - | -          |   |     |     |    |            |               |               |    |
| 76 TM | 2  | -     | -     | - | - | -          | F | Juv | 50  | 34 | VIII 2017  | ARS Liberec   | ARS Liberec   | 1A |
| 76 TM | 3  | -     | -     | - | - | -          |   |     |     |    |            |               |               |    |
| 76 TM | 6  | -     | -     | - | - | -          |   |     |     |    |            |               |               |    |
| 77 TM | 2  | 37,76 | 31,07 | - | - | 2, 6       | M | Ad  | 67  | 30 | 23.08.2017 | 49°53'35.484" | 14°23'41.175" | 2  |
| 78 TM | 2  | 40    | 35,65 | - | - | 6          | F | Ad  | 79  | 32 | 08.05.2017 | 49°56'30.12"  | 15°15'40.80"  | 2I |
| 78 TM | 3  | -     | -     | - | - | -          |   |     |     |    |            |               |               |    |
| 78 TM | 6  | -     | -     | - | - | -          |   |     |     |    |            |               |               |    |
| 78 TM | 10 | 40,18 | -     | - | - | NI         |   |     |     |    |            |               |               |    |
| 80 EE | 1  | 27,47 | 24,13 | - | - | 1          | F | Ad  | 320 | 34 | 31.10.2017 | 49°13'28.362" | 16°31'1.976"  | 1A |
| 80 EE | 3  | 30,28 | 26,22 | - | - | 1, 6       |   |     |     |    |            |               |               |    |
| 80 EE | 4  | 41,04 | 37,33 | - | - | 1,4        |   |     |     |    |            |               |               |    |
| 80 EE | 5  | 35,73 | 30,47 | - | - | NI         |   |     |     |    |            |               |               |    |
| 80 EE | 6  | 36,14 | 33,06 | - | - | NI         |   |     |     |    |            |               |               |    |
| 80 EE | 7  | 35,53 | 30,57 | - | - | NI         |   |     |     |    |            |               |               |    |
| 80 EE | 8  | 28,99 | 22,39 | - | - | 1, 4       |   |     |     |    |            |               |               |    |
| 80 EE | 9  | 34,06 | 30,56 | - | - | NI         |   |     |     |    |            |               |               |    |
| 80 EE | 10 | 41,41 | 35,81 | - | - | 4          |   |     |     |    |            |               |               |    |
| 81 ER | 1  | 29,69 | 25,03 | - | - | 1          | M | Juv | 273 | 34 | 04.11.2017 | 49°25'27.911" | 16°21'5.776"  | 1A |
| 81 ER | 3  | 33,81 | 29,08 | - | - | 2, 4       |   |     |     |    |            |               |               |    |
| 81 ER | 5  | 35,93 | 32,11 | - | - | 4          |   |     |     |    |            |               |               |    |
| 81 ER | 6  | 37,05 | 34,61 | - | - | 4          |   |     |     |    |            |               |               |    |
| 81 ER | 7  | 38,14 | 35,04 | - | - | 1, 4       |   |     |     |    |            |               |               |    |
| 81 ER | 8  | 29,27 | 23,9  | - | - | 1, 2, 4    |   |     |     |    |            |               |               |    |
| 81 ER | 9  | 36,02 | 33,17 | - | - | 1          |   |     |     |    |            |               |               |    |
| 81 ER | 10 | -     | 35,07 | - | - | NI         |   |     |     |    |            |               |               |    |
| 82 EE | 1  | -     | -     | - | - | -          | M | Juv | 243 | 33 | 20.11.2017 | 49°29'33.673" | 16°39'44.611" | 1A |
| 82 EE | 3  | -     | -     | - | - | -          |   |     |     |    |            |               |               |    |
| 82 EE | 4  | -     | -     | - | - | -          |   |     |     |    |            |               |               |    |
| 82 EE | 5  | -     | -     | - | - | -          |   |     |     |    |            |               |               |    |
| 82 EE | 6  | -     | -     | - | - | -          |   |     |     |    |            |               |               |    |
| 82 EE | 7  | -     | -     | - | - | -          |   |     |     |    |            |               |               |    |
| 82 EE | 8  | 39,84 | 34,58 | - | - | 2          |   |     |     |    |            |               |               |    |
| 82 EE | 9  | -     | -     | - | - | -          |   |     |     |    |            |               |               |    |
| 82 EE | 10 | -     | -     | - | - | -          |   |     |     |    |            |               |               |    |
| 83 EE | 1  | -     | -     | - | - | -          | F | Juv | 143 | 25 | 06.11.2017 | ARS Brno      | ARS Brno      | 2  |
| 83 EE | 3  | -     | -     | - | - | -          |   |     |     |    |            |               |               |    |
| 83 EE | 4  | -     | -     | - | - | -          |   |     |     |    |            |               |               |    |
| 83 EE | 5  | -     | -     | - | - | -          |   |     |     |    |            |               |               |    |
| 83 EE | 6  | -     | -     | - | - | -          |   |     |     |    |            |               |               |    |
| 83 EE | 7  | -     | -     | - | - | -          |   |     |     |    |            |               |               |    |
| 83 EE | 8  | -     | 34,78 | - | - | NI         |   |     |     |    |            |               |               |    |
| 83 EE | 9  | -     | -     | - | - | -          |   |     |     |    |            |               |               |    |
| 83 EE | 10 | -     | -     | - | - | -          |   |     |     |    |            |               |               |    |
| 84 EE | 1  | -     | -     | - | - | -          | F | Juv | 123 | 21 | VIII 2017  | ARS Liberec   | ARS Liberec   | 2  |
| 84 EE | 3  | -     | -     | - | - | -          |   |     |     |    |            |               |               |    |
| 84 EE | 4  | -     | -     | - | - | -          |   |     |     |    |            |               |               |    |
| 84 EE | 5  | -     | -     | - | - | -          |   |     |     |    |            |               |               |    |
| 84 EE | 6  | -     | -     | - | - | -          |   |     |     |    |            |               |               |    |
| 84 EE | 7  | -     | -     | - | - | -          |   |     |     |    |            |               |               |    |
| 84 EE | 8  | -     | 34,59 | - | - | 3          |   |     |     |    |            |               |               |    |
| 84 EE | 9  | -     | -     | - | - | -          |   |     |     |    |            |               |               |    |
| 84 EE | 10 | -     | -     | - | - | -          |   |     |     |    |            |               |               |    |
| 85 EE | 1  | 27,29 | 21,8  | - | - | NI         | M | Juv | 268 | 35 | 06.11.2017 | ARS Brno      | ARS Brno      | 1A |
| 85 EE | 3  | 32,17 | 28,09 | - | - | 1          |   |     |     |    |            |               |               |    |
| 85 EE | 4  | -     | -     | - | - | -          |   |     |     |    |            |               |               |    |
| 85 EE | 5  | 32,97 | 29,94 | - | - | 1          |   |     |     |    |            |               |               |    |
| 85 EE | 6  | 38,27 | 35,03 | - | - | NI         |   |     |     |    |            |               |               |    |
| 85 EE | 7  | 38,38 | 35,07 | - | - | 1          |   |     |     |    |            |               |               |    |
| 85 EE | 8  | 28,58 | 25,35 | - | - | 1          |   |     |     |    |            |               |               |    |
| 85 EE | 9  | 37,03 | 33,24 | - | - | NI         |   |     |     |    |            |               |               |    |
| 85 EE | 10 | 37,16 | 33,57 | - | - | 6          |   |     |     |    |            |               |               |    |
| 86 ER | 1  | 37,48 | 32,21 | - | - | NI         | F | Juv | 273 | 31 | 01.11.2017 | 49°11'24.795" | 16°21'38.179" | 1A |
| 86 ER | 3  | 37,07 | 31,92 | - | - | 1, 4       |   |     |     |    |            |               |               |    |
| 86 ER | 4  | -     | 35,35 | - | - | 4          |   |     |     |    |            |               |               |    |
| 86 ER | 5  | 37,84 | 35,67 | - | - | 4          |   |     |     |    |            |               |               |    |
| 86 ER | 6  | -     | -     | - | - | -          |   |     |     |    |            |               |               |    |
| 86 ER | 7  | 34,73 | 32,98 | - | - | 1, 4       |   |     |     |    |            |               |               |    |
| 86 ER | 8  | 29,57 | 25,31 | - | - | 1          |   |     |     |    |            |               |               |    |
| 86 ER | 9  | 35,27 | 33,34 | - | - | 4          |   |     |     |    |            |               |               |    |
| 86 ER | 10 | -     | 36,79 | - | - | 4          |   |     |     |    |            |               |               |    |
| 87 EE | 1  | 29,04 | 24,13 | - | - | 5          | F | Juv | 307 | 35 | 23.11.2017 | 49°17'56.374" | 16°32'17.087" | 1A |
| 87 EE | 3  | 34,91 | 31,14 | - | - | 5          |   |     |     |    |            |               |               |    |
| 87 EE | 4  | -     | -     | - | - | -          |   |     |     |    |            |               |               |    |
| 87 EE | 5  | -     | -     | - | - | -          |   |     |     |    |            |               |               |    |
| 87 EE | 6  | 37,75 | 34,4  | - | - | 2          |   |     |     |    |            |               |               |    |
| 87 EE | 7  | 36,23 | 33,19 | - | - | 1          |   |     |     |    |            |               |               |    |
| 87 EE | 8  | 33,8  | 30,65 | - | - | 2, 4       |   |     |     |    |            |               |               |    |
| 87 EE | 9  | 37,33 | 34,55 | - | - | 1, 2, 4, 5 |   |     |     |    |            |               |               |    |
| 87 EE | 10 | -     | -     | - | - | -          |   |     |     |    |            |               |               |    |
| 88 EE | 1  | 38,18 | 34,44 | - | - | 5          | F | Ad  | 440 | 35 | VIII 2017  | ARS Liberec   | ARS Liberec   | 1B |
| 88 EE | 3  | -     | -     | - | - | -          |   |     |     |    |            |               |               |    |
| 88 EE | 4  | -     | -     | - | - | -          |   |     |     |    |            |               |               |    |
| 88 EE | 5  | -     | -     | - | - | -          |   |     |     |    |            |               |               |    |
| 88 EE | 6  | -     | -     | - | - | -          |   |     |     |    |            |               |               |    |
| 88 EE | 7  | -     | -     | - | - | -          |   |     |     |    |            |               |               |    |
| 88 EE | 8  | -     | -     | - | - | -          |   |     |     |    |            |               |               |    |
| 88 EE | 9  | -     | -     | - | - | -          |   |     |     |    |            |               |               |    |
| 88 EE | 10 | -     | -     | - | - | -          |   |     |     |    |            |               |               |    |

|        |    |       |       |   |   |       |    |      |      |            |             |               |               |    |
|--------|----|-------|-------|---|---|-------|----|------|------|------------|-------------|---------------|---------------|----|
| 89 ER  | 1  | -     | -     | - | - | F     | Ad | 1005 | 33   | 21.05.2017 | 50°3'0.998" | 14°27'31.651" | 1A            |    |
| 89 ER  | 3  | -     | -     | - | - |       |    |      |      |            |             |               |               |    |
| 89 ER  | 4  | -     | -     | - | - |       |    |      |      |            |             |               |               |    |
| 89 ER  | 5  | -     | -     | - | - |       |    |      |      |            |             |               |               |    |
| 89 ER  | 6  | -     | -     | - | - |       |    |      |      |            |             |               |               |    |
| 89 ER  | 7  | -     | -     | - | - |       |    |      |      |            |             |               |               |    |
| 89 ER  | 8  | -     | -     | - | - |       |    |      |      |            |             |               |               |    |
| 89 ER  | 9  | -     | -     | - | - |       |    |      |      |            |             |               |               |    |
| 89 ER  | 10 | -     | -     | - | - |       |    |      |      |            |             |               |               |    |
| 90 EE  | 1  | -     | -     | - | - | M     | Ad | 808  | 39   | 31.05.2017 | 49°03'33.5" | 14°25'36.4"   | 2             |    |
| 90 EE  | 3  | 34,76 | 32,16 | - | - | NI    |    |      |      |            |             |               |               |    |
| 90 EE  | 8  | 35,85 | 31    | - | - | NI    |    |      |      |            |             |               |               |    |
| 90 EE  | 9  | -     | -     | - | - |       |    |      |      |            |             |               |               |    |
| 91 EE  | 1  | -     | 35    | - | - | NI    | M  | Ad   | 752  | 38         | 05.07.2017  | ARS Plzeň     | ARS Plzeň     | 1A |
| 91 EE  | 3  | -     | -     | - | - |       |    |      |      |            |             |               |               |    |
| 91 EE  | 4  | -     | -     | - | - |       |    |      |      |            |             |               |               |    |
| 91 EE  | 5  | -     | -     | - | - |       |    |      |      |            |             |               |               |    |
| 91 EE  | 6  | -     | -     | - | - |       |    |      |      |            |             |               |               |    |
| 91 EE  | 7  | -     | -     | - | - |       |    |      |      |            |             |               |               |    |
| 91 EE  | 8  | -     | -     | - | - |       |    |      |      |            |             |               |               |    |
| 91 EE  | 9  | -     | -     | - | - |       |    |      |      |            |             |               |               |    |
| 91 EE  | 10 | -     | -     | - | - |       |    |      |      |            |             |               |               |    |
| 92 EE  | 1  | 30,43 | 26,84 | - | - | 1     | M  | Ad   | 461  | 38         | 23.06.2017  | ARS Plzeň     | ARS Plzeň     | 1B |
| 92 EE  | 3  | 31,04 | 27,86 | - | - | 1, 2  |    |      |      |            |             |               |               |    |
| 92 EE  | 4  | 37,77 | 35,32 | - | - | 4     |    |      |      |            |             |               |               |    |
| 92 EE  | 5  | 40,8  | 35,6  | - | - | NI    |    |      |      |            |             |               |               |    |
| 92 EE  | 6  | -     | 34,32 | - | - | 33,78 |    |      |      |            |             |               |               |    |
| 92 EE  | 7  | 35,91 | 32,23 | - | - | 1, 4  |    |      |      |            |             |               |               |    |
| 92 EE  | 8  | 31,51 | 27,82 | - | - | 1     |    |      |      |            |             |               |               |    |
| 92 EE  | 9  | 37,83 | 33,06 | - | - | NI    |    |      |      |            |             |               |               |    |
| 92 EE  | 10 | 37,93 | 34,45 | - | - | 4     |    |      |      |            |             |               |               |    |
| 93 EE  | 1  | 38,65 | 34,95 | - | - | NI    | F  | Ad   | 464  | 31         | V 2017      | ARS Plzeň     | ARS Plzeň     | 1A |
| 93 EE  | 3  | -     | -     | - | - |       |    |      |      |            |             |               |               |    |
| 93 EE  | 4  | -     | -     | - | - |       |    |      |      |            |             |               |               |    |
| 93 EE  | 5  | -     | -     | - | - |       |    |      |      |            |             |               |               |    |
| 93 EE  | 6  | -     | -     | - | - |       |    |      |      |            |             |               |               |    |
| 93 EE  | 7  | -     | -     | - | - |       |    |      |      |            |             |               |               |    |
| 93 EE  | 8  | -     | -     | - | - |       |    |      |      |            |             |               |               |    |
| 93 EE  | 9  | -     | -     | - | - |       |    |      |      |            |             |               |               |    |
| 93 EE  | 10 | -     | -     | - | - |       |    |      |      |            |             |               |               |    |
| 94 EE  | 1  | -     | 35,53 | - | - | 1, 3  | M  | Ad   | 1070 | 37         | 18.05.2017  | 48°58'44.825" | 14°26'54.742" | 1A |
| 94 EE  | 3  | -     | -     | - | - |       |    |      |      |            |             |               |               |    |
| 94 EE  | 4  | -     | -     | - | - |       |    |      |      |            |             |               |               |    |
| 94 EE  | 5  | -     | -     | - | - |       |    |      |      |            |             |               |               |    |
| 94 EE  | 6  | 38,77 | -     | - | - | 1     |    |      |      |            |             |               |               |    |
| 94 EE  | 7  | -     | -     | - | - |       |    |      |      |            |             |               |               |    |
| 94 EE  | 8  | -     | -     | - | - |       |    |      |      |            |             |               |               |    |
| 94 EE  | 9  | -     | -     | - | - |       |    |      |      |            |             |               |               |    |
| 94 EE  | 10 | -     | -     | - | - |       |    |      |      |            |             |               |               |    |
| 95 EE  | 1  | 31,5  | 25,99 | - | - | NI    | M  | Juv  | 221  | 30         | VIII 2017   | 49°11'24.795" | 16°21'38.179" | 1A |
| 95 EE  | 3  | 26,89 | 23,86 | - | - | 1     |    |      |      |            |             |               |               |    |
| 95 EE  | 4  | 37,95 | -     | - | - | 4     |    |      |      |            |             |               |               |    |
| 95 EE  | 5  | 32,68 | 29,21 | - | - | 4     |    |      |      |            |             |               |               |    |
| 95 EE  | 6  | 38,62 | 33,78 | - | - | 2, 4  |    |      |      |            |             |               |               |    |
| 95 EE  | 7  | 38,53 | -     | - | - | NI    |    |      |      |            |             |               |               |    |
| 95 EE  | 8  | 29,48 | 25,28 | - | - | 1     |    |      |      |            |             |               |               |    |
| 95 EE  | 9  | 34,95 | 31,95 | - | - | 4     |    |      |      |            |             |               |               |    |
| 95 EE  | 10 | 38,32 | 34,77 | - | - | 1     |    |      |      |            |             |               |               |    |
| 96 EE  | 1  | -     | 39,96 | - | - | NI    | ?  | Ad   | 714  | 36         | 05.07.2017  | 49°6'15.540"  | 16°45'29.954" | 2I |
| 97 TM  | 2  | -     | -     | - | - |       | ?  | Juv  | 44   | 34         | 22.08.2017  | 49°13'28.362" | 16°31'1.976"  | 1A |
| 97 TM  | 3  | 40,48 | -     | - | - | 1     |    |      |      |            |             |               |               |    |
| 97 TM  | 6  | -     | -     | - | - |       |    |      |      |            |             |               |               |    |
| 97 TM  | 10 | -     | -     | - | - |       |    |      |      |            |             |               |               |    |
| 98 EE  | 1  | 37    | 32,53 | - | - | NI    | F  | Ad   | 385  | 34         | 19.05.2017  | 48°58'44.825" | 14°26'54.742" | 2  |
| 98 EE  | 3  | -     | -     | - | - |       |    |      |      |            |             |               |               |    |
| 98 EE  | 9  | -     | -     | - | - |       |    |      |      |            |             |               |               |    |
| 99 EE  | 1  | 38,89 | -     | - | - | NI    | F  | Ad   | 973  | 35         | 17.06.2017  | 48°56'28.500" | 14°21'32.040" | 1B |
| 99 EE  | 3  | -     | -     | - | - |       |    |      |      |            |             |               |               |    |
| 99 EE  | 4  | -     | -     | - | - |       |    |      |      |            |             |               |               |    |
| 99 EE  | 5  | -     | -     | - | - |       |    |      |      |            |             |               |               |    |
| 99 EE  | 6  | -     | -     | - | - |       |    |      |      |            |             |               |               |    |
| 99 EE  | 7  | -     | -     | - | - |       |    |      |      |            |             |               |               |    |
| 99 EE  | 8  | -     | -     | - | - |       |    |      |      |            |             |               |               |    |
| 99 EE  | 9  | -     | -     | - | - |       |    |      |      |            |             |               |               |    |
| 99 EE  | 10 | -     | -     | - | - |       |    |      |      |            |             |               |               |    |
| 100 TM | 2  | 38,24 | 32,6  | - | - | 2     | F  | Ad   | 87   | 32         | 15.07.2017  | 49°16'15.158" | 16°35'47.066" | 1A |
| 100 TM | 3  | -     | -     | - | - |       |    |      |      |            |             |               |               |    |
| 100 TM | 4  | -     | -     | - | - |       |    |      |      |            |             |               |               |    |
| 100 TM | 6  | -     | -     | - | - |       |    |      |      |            |             |               |               |    |
| 100 TM | 10 | -     | -     | - | - |       |    |      |      |            |             |               |               |    |
| 101 TM | 2  | 34,46 | 30,1  | - | - | 2, 6  | F  | Ad   | 92   | 30         | 25.10.2017  | 49°13'2.515"  | 16°36'51.924" | 1A |
| 101 TM | 3  | -     | -     | - | - |       |    |      |      |            |             |               |               |    |
| 101 TM | 4  | -     | -     | - | - |       |    |      |      |            |             |               |               |    |
| 101 TM | 6  | -     | -     | - | - |       |    |      |      |            |             |               |               |    |
| 101 TM | 10 | -     | -     | - | - |       |    |      |      |            |             |               |               |    |
| 102 TM | 2  | -     | -     | - | - |       | F  | Ad   | 83   | 33         | 19.07.2017  | 49°13'3.392"  | 16°35'52.181" | 1B |
| 102 TM | 3  | -     | -     | - | - |       |    |      |      |            |             |               |               |    |
| 102 TM | 4  | -     | -     | - | - |       |    |      |      |            |             |               |               |    |
| 102 TM | 6  | -     | -     | - | - |       |    |      |      |            |             |               |               |    |
| 102 TM | 10 | -     | -     | - | - |       |    |      |      |            |             |               |               |    |
| 103 TM | 2  | -     | -     | - | - |       | M  | Ad   | 79   | 34         | 31.03.2017  | 49°03'26.4"   | 14°26'15.5"   | 1B |
| 103 TM | 3  | -     | -     | - | - |       |    |      |      |            |             |               |               |    |
| 103 TM | 4  | -     | -     | - | - |       |    |      |      |            |             |               |               |    |
| 103 TM | 6  | -     | -     | - | - |       |    |      |      |            |             |               |               |    |
| 103 TM | 10 | -     | -     | - | - |       |    |      |      |            |             |               |               |    |
| 104 TM | 2  | -     | -     | - | - |       | F  | Ad   | 105  | 30         | 12.04.2017  | 48°57'27"     | 14°28'12"     | 1A |
| 104 TM | 3  | -     | -     | - | - |       |    |      |      |            |             |               |               |    |
| 104 TM | 4  | -     | -     | - | - |       |    |      |      |            |             |               |               |    |
| 104 TM | 6  | -     | -     | - | - |       |    |      |      |            |             |               |               |    |
| 104 TM | 10 | -     | -     | - | - |       |    |      |      |            |             |               |               |    |
| 106 TM | 2  | 39,84 | 33,98 | - | - | 1     | F  | Ad   | 73   | 33         | 26.08.2017  | 49°13'3.392"  | 16°35'52.181" | 1A |
| 106 TM | 3  | -     | -     | - | - |       |    |      |      |            |             |               |               |    |
| 106 TM | 4  | -     | -     | - | - |       |    |      |      |            |             |               |               |    |
| 106 TM | 6  | -     | -     | - | - |       |    |      |      |            |             |               |               |    |
| 106 TM | 10 | -     | -     | - | - |       |    |      |      |            |             |               |               |    |
| 107 TM | 2  | 37,66 | 31,32 | - | - | 6     | M  | Ad   | 83   | 32         | 13.05.2017  | 50°18'6.749"  | 14°18'49.200" | 2  |
| 107 TM | 3  | -     | 39,97 | - | - | NI    |    |      |      |            |             |               |               |    |
| 107 TM | 4  | -     | -     | - | - |       |    |      |      |            |             |               |               |    |
| 107 TM | 6  | -     | -     | - | - |       |    |      |      |            |             |               |               |    |
| 107 TM | 10 | -     | -     | - | - |       |    |      |      |            |             |               |               |    |
| 108 TM | 2  | -     | -     | - | - |       | F  | Ad   | 78   | 32         | 25.04.2017  | 48°58'6.525"  | 14°28'6.938"  | 1B |
| 108 TM | 3  | -     | -     | - | - |       |    |      |      |            |             |               |               |    |
| 108 TM | 4  | -     | -     | - | - |       |    |      |      |            |             |               |               |    |
| 108 TM | 6  | -     | -     | - | - |       |    |      |      |            |             |               |               |    |
| 108 TM | 10 | -     | -     | - | - |       |    |      |      |            |             |               |               |    |
| 109 TM | 2  | -     | -     | - | - |       | M  | Ad   | 58   | 35         | 14.08.2017  | 49°17'56.370" | 16°32'17.080" | 2  |
| 109 TM | 3  | -     | -     | - | - |       |    |      |      |            |             |               |               |    |
| 109 TM | 4  | -     | -     | - | - |       |    |      |      |            |             |               |               |    |
| 109 TM | 6  | -     | -     | - | - |       |    |      |      |            |             |               |               |    |
| 109 TM | 10 | -     | -     | - | - |       |    |      |      |            |             |               |               |    |
| 111 TM | 2  | 35,39 | 30,57 | - | - | 6     | M  | Ad   | 85   | 32         | 13.05.2017  | 50°17'54.512" | 14°18'47.346" | 1B |
| 111 TM | 3  | -     | -     | - | - |       |    |      |      |            |             |               |               |    |
| 111 TM | 4  | -     | -     | - | - |       |    |      |      |            |             |               |               |    |
| 111 TM | 6  | -     | -     | - | - |       |    |      |      |            |             |               |               |    |
| 111 TM | 10 | -     | -     | - | - |       |    |      |      |            |             |               |               |    |

|        |    |       |       |   |   |       |   |     |     |    |            |               |               |    |
|--------|----|-------|-------|---|---|-------|---|-----|-----|----|------------|---------------|---------------|----|
| 112 EE | 1  | 38,09 | 34,7  | - |   | 1     | M | Ad  | 487 | 40 | 25.01.2017 | 49°12'25.061" | 16°29'23.562" | 1A |
| 112 EE | 3  | -     | -     | - | - |       |   |     |     |    |            |               |               |    |
| 112 EE | 4  | -     | -     | - | - |       |   |     |     |    |            |               |               |    |
| 112 EE | 5  | -     | -     | - | - |       |   |     |     |    |            |               |               |    |
| 112 EE | 6  | -     | -     | - | - |       |   |     |     |    |            |               |               |    |
| 112 EE | 7  | -     | -     | - | - |       |   |     |     |    |            |               |               |    |
| 112 EE | 8  | -     | -     | - | - |       |   |     |     |    |            |               |               |    |
| 112 EE | 9  | -     | -     | - | - |       |   |     |     |    |            |               |               |    |
| 112 EE | 10 | 39,82 | -     | - | - |       |   |     |     |    |            |               |               |    |
| 114 TM | 2  | -     | 39,94 | - | - | NI    | M | Ad  | 87  | 32 | 16.05.2017 | 48°58'47.972" | 14°27'13.146" | 2  |
| 114 TM | 3  | -     | -     | - | - |       |   |     |     |    |            |               |               |    |
| 114 TM | 4  | -     | -     | - | - |       |   |     |     |    |            |               |               |    |
| 114 TM | 6  | -     | -     | - | - |       |   |     |     |    |            |               |               |    |
| 114 TM | 10 | -     | -     | - | - |       |   |     |     |    |            |               |               |    |
| 116 TM | 2  | 30,2  | 22,77 | - | - | 2     | F | Ad  | 65  | 36 | V 2017     | ARS Plzeň     | ARS Plzeň     | 1B |
| 116 TM | 3  | -     | -     | - | - |       |   |     |     |    |            |               |               |    |
| 116 TM | 4  | -     | -     | - | - |       |   |     |     |    |            |               |               |    |
| 116 TM | 6  | 40,91 | 34,55 | - | - | NI    |   |     |     |    |            |               |               |    |
| 116 TM | 10 | -     | 36,27 | - | - | NI    |   |     |     |    |            |               |               |    |
| 117 TM | 2  | -     | 33,47 | - | - | 3     | M | Ad  | 90  | 32 | 03.05.2017 | 48°58'32.2"   | 14°30'02.0"   | 2! |
| 117 TM | 3  | -     | -     | - | - |       |   |     |     |    |            |               |               |    |
| 117 TM | 6  | -     | -     | - | - |       |   |     |     |    |            |               |               |    |
| 117 TM | 10 | -     | -     | - | - |       |   |     |     |    |            |               |               |    |
| 118 TM | 2  | -     | -     | - | - |       | F | Ad  | 81  | 34 | V 2017     | ARS Plzeň     | ARS Plzeň     | 2  |
| 118 TM | 3  | -     | -     | - | - |       |   |     |     |    |            |               |               |    |
| 118 TM | 4  | -     | -     | - | - |       |   |     |     |    |            |               |               |    |
| 118 TM | 6  | -     | -     | - | - |       |   |     |     |    |            |               |               |    |
| 118 TM | 10 | -     | -     | - | - |       |   |     |     |    |            |               |               |    |
| 119 EE | 1  | 29,78 | 25,29 | - | - | 1     | F | Juv | 290 | 36 | 02.12.2017 | ARS Brno      | ARS Brno      | 2  |
| 119 EE | 3  | 33,58 | 28,74 | - | - | 1     |   |     |     |    |            |               |               |    |
| 119 EE | 4  | -     | -     | - | - |       |   |     |     |    |            |               |               |    |
| 119 EE | 5  | 34,09 | 29,62 | - | - | NI    |   |     |     |    |            |               |               |    |
| 119 EE | 6  | 36,49 | 33,54 | - | - | 1     |   |     |     |    |            |               |               |    |
| 119 EE | 7  | 36,31 | 31,29 | - | - | 5     |   |     |     |    |            |               |               |    |
| 119 EE | 8  | 28,72 | 23,68 | - | - | 1, 5  |   |     |     |    |            |               |               |    |
| 119 EE | 9  | 35,51 | 31,65 | - | - | 1     |   |     |     |    |            |               |               |    |
| 119 EE | 10 | -     | -     | - | - |       |   |     |     |    |            |               |               |    |
| 120 EE | 1  | 30,96 | 26,71 | - | - | 5     | M | Ad  | 372 | 34 | 19.01.2018 | ARS Brno      | ARS Brno      | 1A |
| 120 EE | 3  | 36,05 | 30,91 | - | - | 1, 3  |   |     |     |    |            |               |               |    |
| 120 EE | 4  | -     | -     | - | - |       |   |     |     |    |            |               |               |    |
| 120 EE | 5  | -     | -     | - | - |       |   |     |     |    |            |               |               |    |
| 120 EE | 6  | -     | -     | - | - |       |   |     |     |    |            |               |               |    |
| 120 EE | 7  | -     | -     | - | - |       |   |     |     |    |            |               |               |    |
| 120 EE | 8  | -     | -     | - | - |       |   |     |     |    |            |               |               |    |
| 120 EE | 9  | -     | -     | - | - |       |   |     |     |    |            |               |               |    |
| 120 EE | 10 | -     | 36,59 | - | - | 1     |   |     |     |    |            |               |               |    |
| 121 EE | 1  | 33,54 | 29,02 | - | - | NI    | F | Juv | 258 | 31 | XII 2017   | ARS Brno      | ARS Brno      | 1B |
| 121 EE | 3  | -     | 35,13 | - | - | NI    |   |     |     |    |            |               |               |    |
| 121 EE | 4  | -     | -     | - | - |       |   |     |     |    |            |               |               |    |
| 121 EE | 5  | -     | -     | - | - |       |   |     |     |    |            |               |               |    |
| 121 EE | 6  | -     | 36    | - | - | NI    |   |     |     |    |            |               |               |    |
| 121 EE | 7  | -     | -     | - | - |       |   |     |     |    |            |               |               |    |
| 121 EE | 8  | 37,5  | 33,34 | - | - | 4, 5  |   |     |     |    |            |               |               |    |
| 121 EE | 9  | 38,01 | -     | - | - | 5     |   |     |     |    |            |               |               |    |
| 121 EE | 10 | -     | 34,82 | - | - | NI    |   |     |     |    |            |               |               |    |
| 122 EE | 1  | 29,58 | 24,7  | - | - | 1, 3  | F | Ad  | 341 | 37 | 06.12.2017 | ARS Brno      | ARS Brno      | 1A |
| 122 EE | 3  | 33,85 | 25,58 | - | - | 1, 2  |   |     |     |    |            |               |               |    |
| 122 EE | 4  | -     | -     | - | - |       |   |     |     |    |            |               |               |    |
| 122 EE | 5  | 35,89 | 29,18 | - | - | 4     |   |     |     |    |            |               |               |    |
| 122 EE | 6  | -     | 33,52 | - | - | 5     |   |     |     |    |            |               |               |    |
| 122 EE | 7  | -     | 29,82 | - | - | 1     |   |     |     |    |            |               |               |    |
| 122 EE | 8  | 30,57 | 25,04 | - | - | 1, 2  |   |     |     |    |            |               |               |    |
| 122 EE | 9  | -     | 33,86 | - | - | NI    |   |     |     |    |            |               |               |    |
| 122 EE | 10 | -     | -     | - | - |       |   |     |     |    |            |               |               |    |
| 123 SV | 1  | 40,46 | 33,77 | - | - | NI    | M | Ad  | 337 | 42 | 14.04.2017 | 49°36'05.2"   | 14°34'54.3"   | 1B |
| 123 SV | 3  | 41,61 | 35,53 | - | - | 4     |   |     |     |    |            |               |               |    |
| 123 SV | 4  | -     | -     | - | - |       |   |     |     |    |            |               |               |    |
| 123 SV | 5  | -     | -     | - | - | 35,05 |   |     |     |    |            |               |               |    |
| 123 SV | 6  | -     | -     | - | - | 36,3  |   |     |     |    |            |               |               |    |
| 123 SV | 7  | -     | -     | - | - | 36,2  |   |     |     |    |            |               |               |    |
| 123 SV | 8  | 41,13 | 40,17 | - | - | NI    |   |     |     |    |            |               |               |    |
| 123 SV | 9  | -     | -     | - | - |       |   |     |     |    |            |               |               |    |
| 124 SV | 1  | -     | 35,03 | - | - | NI    | M | Juv | 110 | 39 | VIII 2017  | ARS Plzeň     | ARS Plzeň     | 1A |
| 124 SV | 3  | -     | -     | - | - |       |   |     |     |    |            |               |               |    |
| 124 SV | 4  | -     | -     | - | - |       |   |     |     |    |            |               |               |    |
| 124 SV | 5  | -     | -     | - | - |       |   |     |     |    |            |               |               |    |
| 124 SV | 6  | -     | -     | - | - |       |   |     |     |    |            |               |               |    |
| 124 SV | 7  | -     | -     | - | - |       |   |     |     |    |            |               |               |    |
| 124 SV | 8  | 38,98 | 36,46 | - | - | NI    |   |     |     |    |            |               |               |    |
| 124 SV | 9  | -     | -     | - | - |       |   |     |     |    |            |               |               |    |
| 124 SV | 10 | -     | -     | - | - |       |   |     |     |    |            |               |               |    |
| 125 SV | 1  | -     | -     | - | - |       | ? | Ad  | 237 | 46 | 04.10.2017 | 50°4'20.118"  | 14°25'28.149" | 2  |
| 125 SV | 3  | -     | -     | - | - |       |   |     |     |    |            |               |               |    |
| 125 SV | 6  | -     | 35,5  | - | - | 4     |   |     |     |    |            |               |               |    |
| 126 EE | 1  | 28,53 | 24,29 | - | - | 1     | F | Juv | 282 | 35 | 01.02.2018 | ARS Brno      | ARS Brno      | 1A |
| 126 EE | 3  | 33,06 | 29,52 | - | - | NI    |   |     |     |    |            |               |               |    |
| 126 EE | 4  | -     | -     | - | - |       |   |     |     |    |            |               |               |    |
| 126 EE | 5  | 36,35 | 31,04 | - | - | NI    |   |     |     |    |            |               |               |    |
| 126 EE | 6  | 37,66 | 33,75 | - | - | NI    |   |     |     |    |            |               |               |    |
| 126 EE | 7  | -     | 34,91 | - | - | NI    |   |     |     |    |            |               |               |    |
| 126 EE | 8  | 32,2  | 28,03 | - | - | NI    |   |     |     |    |            |               |               |    |
| 126 EE | 9  | 39,28 | -     | - | - | NI    |   |     |     |    |            |               |               |    |
| 126 EE | 10 | -     | -     | - | - |       |   |     |     |    |            |               |               |    |
| 127 EE | 1  | 32,95 | 25,95 | - | - | NI    | M | Ad  | 359 | 36 | 23.12.2017 | ARS Brno      | ARS Brno      | 1A |
| 127 EE | 3  | 32,13 | 28,26 | - | - | 2, 5  |   |     |     |    |            |               |               |    |
| 127 EE | 4  | -     | -     | - | - |       |   |     |     |    |            |               |               |    |
| 127 EE | 5  | 36,48 | -     | - | - | 5     |   |     |     |    |            |               |               |    |
| 127 EE | 6  | 37,51 | 36,08 | - | - | 1     |   |     |     |    |            |               |               |    |
| 127 EE | 7  | -     | -     | - | - |       |   |     |     |    |            |               |               |    |
| 127 EE | 8  | -     | 35,19 | - | - | NI    |   |     |     |    |            |               |               |    |
| 127 EE | 9  | -     | -     | - | - |       |   |     |     |    |            |               |               |    |
| 127 EE | 10 | -     | -     | - | - |       |   |     |     |    |            |               |               |    |
| 128 TM | 2  | 37,6  | 31,9  | - | - | 1     | M | Ad  | 99  | 34 | 15.11.2017 | 48°58'39.187" | 14°26'53.039" | 1A |
| 128 TM | 3  | -     | -     | - | - |       |   |     |     |    |            |               |               |    |
| 128 TM | 4  | -     | -     | - | - |       |   |     |     |    |            |               |               |    |
| 128 TM | 6  | -     | -     | - | - |       |   |     |     |    |            |               |               |    |
| 128 TM | 10 | -     | -     | - | - |       |   |     |     |    |            |               |               |    |
| 129 EE | 1  | 34    | 28,27 | - | - | 1     | F | Ad  | 380 | 37 | 13.10.2017 | 48°57'43.030" | 14°26'27.964" | 2  |
| 129 EE | 3  | 31,8  | 28,22 | - | - | 1     |   |     |     |    |            |               |               |    |
| 129 EE | 5  | 38,92 | 33,43 | - | - | NI    |   |     |     |    |            |               |               |    |
| 129 EE | 7  | -     | 46,21 | - | - | NI    |   |     |     |    |            |               |               |    |
| 129 EE | 8  | 32,66 | 29,12 | - | - | 1     |   |     |     |    |            |               |               |    |
| 129 EE | 9  | 37,99 | -     | - | - | NI    |   |     |     |    |            |               |               |    |
| 130 EE | 1  | -     | -     | - | - |       | F | Ad  | 386 | 36 | 11.12.2017 | 49°53'06.7"   | 15°23'05.6"   | 1B |
| 130 EE | 3  | -     | -     | - | - |       |   |     |     |    |            |               |               |    |
| 130 EE | 8  | -     | -     | - | - |       |   |     |     |    |            |               |               |    |
| 131 EE | 1  | 33,17 | 29,78 | - | - | 1     | M | Ad  | 469 | 33 | 16.10.2017 | 48°58'36.874" | 14°26'52.579" | 2  |
| 131 EE | 3  | 31,26 | 27,98 | - | - | 1     |   |     |     |    |            |               |               |    |
| 131 EE | 4  | -     | -     | - | - |       |   |     |     |    |            |               |               |    |
| 131 EE | 5  | 33,68 | 29,71 | - | - | 1     |   |     |     |    |            |               |               |    |
| 131 EE | 6  | 36,95 | 32,87 | - | - | 1     |   |     |     |    |            |               |               |    |
| 131 EE | 7  | -     | 35,96 | - | - | NI    |   |     |     |    |            |               |               |    |
| 131 EE | 8  | 31,65 | 27,7  | - | - | 1     |   |     |     |    |            |               |               |    |
| 131 EE | 9  | 33,09 | 28,54 | - | - | 1     |   |     |     |    |            |               |               |    |
| 131 EE | 10 | 39,55 | 35,78 | - | - | NI    |   |     |     |    |            |               |               |    |

[illegible]
