# Supplementary material for: Hedgehogs, Squirrels, and Blackbirds as Sentinel Hosts for Active Surveillance of Borrelia miyamotoi and Borrelia burgdorferi Complex in Urban and Rural Environments
Source: MDPI journal article supplement (doi:10.3390/microorganisms8121908), 2020-11-30
Supplement: s1 [file s1]

Table S5: *Erinaceus europaeus* – combinations of *Borrelia burgdorferi* s.l. genospecies found in animals with mixed infections

| Number of specimens | <i>B. afzelii</i> | <i>B. garinii</i> | <i>B. bavariensis</i> | <i>B. burgdorferi</i> s.s | <i>B. spielmanii</i> | <i>B. valaisiana</i> | <i>B. bissettii</i> / <i>carolinensis</i> |
|---------------------|-------------------|-------------------|-----------------------|---------------------------|----------------------|----------------------|-------------------------------------------|
| 1                   | X                 | X                 |                       |                           |                      |                      |                                           |
| 1                   | X                 |                   | X                     |                           |                      |                      |                                           |
| 1                   | X                 |                   |                       | X                         |                      |                      |                                           |
| 1                   | X                 |                   |                       |                           | X                    |                      |                                           |
| 1                   | X                 |                   |                       |                           |                      | X                    |                                           |
| 1                   |                   |                   |                       | X                         | X                    |                      |                                           |
| 2                   | X                 | X                 |                       | X                         |                      |                      |                                           |
| 1                   | X                 | X                 |                       |                           | X                    |                      |                                           |
| 1                   | X                 |                   | X                     |                           | X                    |                      |                                           |
| 1                   | X                 |                   |                       | X                         |                      | X                    |                                           |
| 1                   |                   | X                 | X                     |                           | X                    |                      |                                           |
| 1                   | X                 |                   | X                     | X                         |                      |                      |                                           |
| 1                   | X                 | X                 |                       | X                         | X                    |                      |                                           |
| 1                   | X                 | X                 | X                     | X                         | X                    |                      |                                           |
| 1                   | X                 |                   | X                     | X                         | X                    |                      | X                                         |
| 1                   | X                 | X                 |                       | X                         | X                    |                      | X                                         |
| 1                   | X                 | X                 | X                     | X                         | X                    |                      | X                                         |
